# Supplementary material for: Negative affordance effect: automatic response inhibition triggered by handle orientation of non-target object
Source: Psychol Res. 2021 Sep 25;86(6):1737–50. doi: 10.1007/s00426-021-01600-8 (PMC8475350; doi:10.1007/s00426-021-01600-8)
Supplement: Supplementary file 1 — Supplementary file1 (XLSX 1205 KB) [file 426_2021_1600_MOESM1_ESM.xlsx]

## Sheet: Taul1
	participant	freq_block	comp	exp	orientation	req_resp	cut_RT	RT	response	correct	errors	false_alarm			participant	freq_block	comp	error%			participant	freq_block	comp	exp	false_alarm%
	1	1	0	1	2	0			0	0	0	0			28	1	1	1.04			1	1	1	1	0
	1	1	1	1	2	2	520.07	520.07	2	1	0	0			29	1	1	2.08			2	1	1	1	1.04
	1	1	1	1	2	2	411.57	411.57	2	1	0	0			30	1	1	2.08			3	1	1	1	0.69
	1	1	1	1	2	2	336.47	336.47	2	1	0	0			31	1	1	0			5	1	1	1	0.35
	1	1	1	1	2	2	378.17	378.17	2	1	0	0			32	1	1	1.04			6	1	1	1	0
	1	1	0	1	1	0			2	0	0	1			33	1	1	0			7	1	1	1	0.35
	1	1	0	1	2	0			0	0	0	0			34	1	1	2.08			8	1	1	1	1.74
	1	1	0	1	2	0			0	0	0	0			35	1	1	0			9	1	1	1	0
	1	1	1	1	2	2	336.77	336.77	2	1	0	0			36	1	1	0			10	1	1	1	1.39
	1	1	2	1	1	2	378.27	378.27	2	1	0	0			37	1	1	1.04			11	1	1	1	0.35
	1	1	0	1	1	0			0	0	0	0			38	1	1	0			14	1	1	1	0
	1	1	0	1	1	0			0	0	0	0			39	1	1	0			15	1	1	1	0
	1	1	0	1	1	0			0	0	0	0			40	1	1	4.17			16	1	1	1	0
	1	1	0	1	1	0			0	0	0	0			41	1	1	0			17	1	1	1	1.74
	1	1	0	1	1	0			0	0	0	0			42	1	1	3.13			18	1	1	1	0
	1	1	1	1	2	2	420.17	420.17	2	1	0	0			43	1	1	0			19	1	1	1	0.35
	1	1	2	1	1	2	420.27	420.27	2	1	0	0			44	1	1	0			20	1	1	1	0
	1	1	1	1	2	2	320.17	320.17	2	1	0	0			45	1	1	1.04			21	1	1	1	0.35
	1	1	0	1	2	0			0	0	0	0			46	1	1	0			22	1	1	1	0
	1	1	0	1	2	0			0	0	0	0			47	1	1	1.04			23	1	1	1	0.35
	1	1	0	1	1	0			0	0	0	0			48	1	1	0			24	1	1	1	0.35
	1	1	0	1	2	0			0	0	0	0			49	1	1	1.04			26	1	1	1	0
	1	1	0	1	2	0			0	0	0	0			50	1	1	1.04			27	1	1	1	0.35
	1	1	0	1	2	0			0	0	0	0			51	1	1	0			28	1	1	2	0
	1	1	0	1	2	0			0	0	0	0			53	1	1	2.08			29	1	1	2	1.04
	1	1	0	1	1	0			0	0	0	0			55	1	1	0			30	1	1	2	0
	1	1	0	1	2	0			0	0	0	0			56	1	1	0			31	1	1	2	0
	1	1	2	1	1	2	361.57	361.57	2	1	0	0			57	1	1	0			32	1	1	2	0
	1	1	1	1	2	2	361.37	361.37	2	1	0	0			60	1	1	1.04			33	1	1	2	0
	1	1	0	1	2	0			2	0	0	1			61	1	1	1.04			35	1	1	2	0.35
	1	1	0	1	1	0			0	0	0	0			28	1	2	1.04			37	1	1	2	0
	1	1	0	1	1	0			0	0	0	0			29	1	2	1.04			38	1	1	2	0
	1	1	0	1	2	0			0	0	0	0			30	1	2	0			39	1	1	2	0
	1	1	0	1	1	0			0	0	0	0			31	1	2	2.08			40	1	1	2	0.69
	1	1	0	1	1	0			0	0	0	0			32	1	2	0			41	1	1	2	0
	1	1	2	1	1	2	478.17	478.17	2	1	0	0			33	1	2	0			42	1	1	2	0.35
	1	1	0	1	2	0			0	0	0	0			34	1	2	2.08			43	1	1	2	0
	1	1	0	1	2	0			0	0	0	0			35	1	2	1.04			45	1	1	2	0
	1	1	1	1	2	2	569.97	569.97	2	1	0	0			36	1	2	0			46	1	1	2	0
	1	1	0	1	1	0			0	0	0	0			37	1	2	1.04			49	1	1	2	0
	1	1	0	1	1	0			0	0	0	0			38	1	2	0			51	1	1	2	0.69
	1	1	0	1	2	0			0	0	0	0			39	1	2	0			52	1	1	2	0
	1	1	2	1	1	2	436.57	436.57	2	1	0	0			40	1	2	0			53	1	1	2	0
	1	1	2	1	1	2	536.47	536.47	2	1	0	0			41	1	2	2.08			56	1	1	2	0.35
	1	1	0	1	2	0			0	0	0	0			42	1	2	1.04			57	1	1	2	0
	1	1	1	1	2	2	478.37	478.37	2	1	0	0			43	1	2	0			58	1	1	1	0
	1	1	0	1	1	0			0	0	0	0			44	1	2	0			59	1	1	1	0.69
	1	1	0	1	2	0			0	0	0	0			45	1	2	0			60	1	1	2	0.35
	1	1	1	1	2	2	336.57	336.57	2	1	0	0			46	1	2	0			61	1	1	2	0
	1	1	0	1	2	0			0	0	0	0			47	1	2	0			1	1	2	1	0.69
	1	1	0	1	1	0			0	0	0	0			48	1	2	0			2	1	2	1	0
	1	1	0	1	1	0			0	0	0	0			49	1	2	0			3	1	2	1	0.69
	1	1	0	1	2	0			0	0	0	0			50	1	2	0			5	1	2	1	0.35
	1	1	0	1	2	0			0	0	0	0			51	1	2	2.08			6	1	2	1	0
	1	1	2	1	1	2	378.07	378.07	2	1	0	0			53	1	2	2.08			7	1	2	1	0
	1	1	0	1	2	0			0	0	0	0			55	1	2	1.04			8	1	2	1	0.35
	1	1	0	1	1	0			0	0	0	0			56	1	2	0			9	1	2	1	0
	1	1	0	1	2	0			0	0	0	0			57	1	2	0			10	1	2	1	5.21
	1	1	0	1	2	0			0	0	0	0			60	1	2	2.08			11	1	2	1	1.04
	1	1	0	1	1	0			0	0	0	0			61	1	2	4.17			14	1	2	1	0.35
	1	1	0	1	1	0			0	0	0	0			28	2	1	3.13			15	1	2	1	1.04
	1	1	0	1	2	0			0	0	0	0			29	2	1	6.25			16	1	2	1	0
	1	1	1	1	2	2	378.17	378.17	2	1	0	0			30	2	1	4.17			17	1	2	1	0.35
	1	1	0	1	1	0			0	0	0	0			31	2	1	5.21			18	1	2	1	0
	1	1	0	1	1	0			0	0	0	0			32	2	1	0			19	1	2	1	0
	1	1	0	1	1	0			0	0	0	0			33	2	1	1.04			20	1	2	1	1.39
	1	1	0	1	2	0			0	0	0	0			34	2	1	6.25			21	1	2	1	0.35
	1	1	0	1	1	0			0	0	0	0			35	2	1	5.21			22	1	2	1	0.35
	1	1	0	1	1	0			0	0	0	0			36	2	1	1.04			23	1	2	1	0
	1	1	0	1	2	0			0	0	0	0			37	2	1	1.04			24	1	2	1	0.35
	1	1	0	1	1	0			0	0	0	0			38	2	1	1.04			26	1	2	1	0
	1	1	0	1	2	0			0	0	0	0			39	2	1	1.04			27	1	2	1	0
	1	1	2	1	1	2	444.87	444.87	2	1	0	0			40	2	1	2.08			28	1	2	2	0
	1	1	0	1	2	0			0	0	0	0			41	2	1	0			29	1	2	2	2.43
	1	1	0	1	1	0			0	0	0	0			42	2	1	8.33			30	1	2	2	0.35
	1	1	0	1	2	0			0	0	0	0			43	2	1	1.04			31	1	2	2	0
	1	1	0	1	1	0			0	0	0	0			44	2	1	3.13			32	1	2	2	0
	1	1	0	1	1	0			0	0	0	0			45	2	1	1.04			33	1	2	2	0.35
	1	1	0	1	2	0			0	0	0	0			46	2	1	5.21			35	1	2	2	0.35
	1	1	0	1	2	0			0	0	0	0			47	2	1	2.08			37	1	2	2	0.69
	1	1	0	1	2	0			0	0	0	0			48	2	1	1.04			38	1	2	2	0.35
	1	1	0	1	2	0			0	0	0	0			49	2	1	1.04			39	1	2	2	0
	1	1	2	1	1	2	478.27	478.27	2	1	0	0			50	2	1	0			40	1	2	2	0
	1	1	0	1	1	0			0	0	0	0			51	2	1	3.13			41	1	2	2	0.35
	1	1	0	1	2	0			0	0	0	0			53	2	1	5.21			42	1	2	2	0.35
	1	1	2	1	1	2	411.47	411.47	2	1	0	0			55	2	1	2.08			43	1	2	2	0
	1	1	0	1	1	0			0	0	0	0			56	2	1	2.08			45	1	2	2	0
	1	1	0	1	2	0			0	0	0	0			57	2	1	2.08			46	1	2	2	0.35
	1	1	0	1	1	0			0	0	0	0			60	2	1	0			49	1	2	2	0.69
	1	1	0	1	1	0			0	0	0	0			61	2	1	8.33			51	1	2	2	0
	1	1	2	1	1	2	386.57	386.57	2	1	0	0			28	2	2	0			52	1	2	2	0
	1	1	0	1	2	0			0	0	0	0			29	2	2	1.04			53	1	2	2	0
	1	1	0	1	2	0			0	0	0	0			30	2	2	0			56	1	2	2	0
	1	1	0	1	1	0			0	0	0	0			31	2	2	1.04			57	1	2	2	0.69
	1	1	1	1	2	2	478.17	478.17	2	1	0	0			32	2	2	0			58	1	2	1	0
	1	1	2	1	1	2	537.07	537.07	2	1	0	0			33	2	2	0			59	1	2	1	1.39
	1	1	0	1	1	0			0	0	0	0			34	2	2	0			60	1	2	2	0.35
	1	1	0	1	1	0			0	0	0	0			35	2	2	0			61	1	2	2	0
	1	1	2	1	1	2	436.77	436.77	2	1	0	0			36	2	2	0			1	2	1	1	0
	1	1	0	1	2	0			0	0	0	0			37	2	2	0			2	2	1	1	6.25
	1	1	0	1	2	0			0	0	0	0			38	2	2	0			3	2	1	1	6.25
	1	1	0	1	1	0			0	0	0	0			39	2	2	0			5	2	1	1	3.13
	1	1	0	1	1	0			0	0	0	0			40	2	2	0			6	2	1	1	3.13
	1	1	1	1	2	2	486.67	486.67	2	1	0	0			41	2	2	0			7	2	1	1	3.13
	1	1	0	1	2	0			0	0	0	0			42	2	2	1.04			8	2	1	1	9.38
	1	1	0	1	1	0			0	0	0	0			43	2	2	1.04			9	2	1	1	3.13
	1	1	0	1	1	0			0	0	0	0			44	2	2	0			10	2	1	1	31.25
	1	1	0	1	1	0			0	0	0	0			45	2	2	1.04			11	2	1	1	3.13
	1	1	0	1	1	0			0	0	0	0			46	2	2	0			14	2	1	1	6.25
	1	1	0	1	1	0			0	0	0	0			47	2	2	0			15	2	1	1	12.5
	1	1	2	1	1	2	494.87	494.87	2	1	0	0			48	2	2	0			16	2	1	1	6.25
	1	1	0	1	2	0			0	0	0	0			49	2	2	0			17	2	1	1	9.38
	1	1	1	1	2	2	403.47	403.47	2	1	0	0			50	2	2	0			18	2	1	1	0
	1	1	0	1	2	0			0	0	0	0			51	2	2	1.04			19	2	1	1	6.25
	1	1	0	1	1	0			0	0	0	0			53	2	2	2.08			20	2	1	1	12.5
	1	1	0	1	1	0			0	0	0	0			55	2	2	0			21	2	1	1	3.13
	1	1	0	1	1	0			0	0	0	0			56	2	2	0			22	2	1	1	21.88
	1	1	0	1	2	0			0	0	0	0			57	2	2	0			23	2	1	1	12.5
	1	1	0	1	1	0			0	0	0	0			60	2	2	4.17			24	2	1	1	3.13
	1	1	0	1	2	0			0	0	0	0			61	2	2	0			26	2	1	1	0
	1	1	2	1	1	2	453.37	453.37	2	1	0	0									27	2	1	1	6.25
	1	1	0	1	2	0			0	0	0	0									28	2	1	2	0
	1	1	1	1	2	2	470.07	470.07	2	1	0	0									29	2	1	2	0
	1	1	0	1	1	0			0	0	0	0									30	2	1	2	0
	1	1	0	1	2	0			0	0	0	0									31	2	1	2	0
	1	1	2	1	1	2	444.87	444.87	2	1	0	0									32	2	1	2	0
	1	1	0	1	2	0			0	0	0	0									33	2	1	2	0
	1	1	0	1	2	0			0	0	0	0									35	2	1	2	0
	1	1	0	1	1	0			0	0	0	0									37	2	1	2	0
	1	1	0	1	2	0			0	0	0	0									38	2	1	2	0
	1	1	1	1	2	2	428.17	428.17	2	1	0	0									39	2	1	2	0
	1	1	0	1	2	0			0	0	0	0									40	2	1	2	0
	1	1	0	1	1	0			0	0	0	0									41	2	1	2	0
	1	1	0	1	2	0			0	0	0	0									42	2	1	2	0
	1	1	0	1	1	0			0	0	0	0									43	2	1	2	3.13
	1	1	0	1	1	0			0	0	0	0									45	2	1	2	0
	1	1	0	1	1	0			0	0	0	0									46	2	1	2	0
	1	1	0	1	1	0			0	0	0	0									49	2	1	2	0
	1	1	2	1	1	2	453.57	453.57	2	1	0	0									51	2	1	2	0
	1	1	0	1	2	0			0	0	0	0									52	2	1	2	0
	1	1	0	1	1	0			0	0	0	0									53	2	1	2	0
	1	1	2	1	1	2	336.57	336.57	2	1	0	0									56	2	1	2	0
	1	1	0	1	1	0			0	0	0	0									57	2	1	2	0
	1	1	0	1	2	0			0	0	0	0									58	2	1	1	3.13
	1	1	2	1	1	2	370.07	370.07	2	1	0	0									59	2	1	1	3.13
	1	1	0	1	1	0			0	0	0	0									60	2	1	2	3.13
	1	1	1	1	2	2	486.67	486.67	2	1	0	0									61	2	1	2	0
	1	1	0	1	2	0			0	0	0	0									1	2	2	1	3.13
	1	1	0	1	2	0			0	0	0	0									2	2	2	1	0
	1	1	0	1	2	0			0	0	0	0									3	2	2	1	15.63
	1	1	0	1	2	0			0	0	0	0									5	2	2	1	3.13
	1	1	0	1	2	0			0	0	0	0									6	2	2	1	0
	1	1	0	1	2	0			0	0	0	0									7	2	2	1	3.13
	1	1	0	1	1	0			0	0	0	0									8	2	2	1	6.25
	1	1	0	1	1	0			0	0	0	0									9	2	2	1	6.25
	1	1	0	1	1	0			0	0	0	0									10	2	2	1	31.25
	1	1	0	1	1	0			0	0	0	0									11	2	2	1	3.13
	1	1	2	1	1	2	519.57	519.57	2	1	0	0									14	2	2	1	3.13
	1	1	1	1	2	2	453.37	453.37	2	1	0	0									15	2	2	1	18.75
	1	1	0	1	2	0			0	0	0	0									16	2	2	1	15.63
	1	1	0	1	1	0			0	0	0	0									17	2	2	1	9.38
	1	1	1	1	2	2	453.07	453.07	2	1	0	0									18	2	2	1	9.38
	1	1	0	1	2	0			0	0	0	0									19	2	2	1	15.63
	1	1	2	1	1	2	361.37	361.37	2	1	0	0									20	2	2	1	18.75
	1	1	0	1	2	0			0	0	0	0									21	2	2	1	0
	1	1	0	1	2	0			0	0	0	0									22	2	2	1	25
	1	1	2	1	1	2	478.27	478.27	2	1	0	0									23	2	2	1	0
	1	1	2	1	1	2	494.87	494.87	2	1	0	0									24	2	2	1	3.13
	1	1	0	1	2	0			0	0	0	0									26	2	2	1	6.25
	1	1	0	1	1	0			0	0	0	0									27	2	2	1	6.25
	1	1	0	1	2	0			0	0	0	0									28	2	2	2	3.13
	1	1	0	1	1	0			0	0	0	0									29	2	2	2	12.5
	1	1	2	1	1	2	344.67	344.67	2	1	0	0									30	2	2	2	3.13
	1	1	0	1	2	0			0	0	0	0									31	2	2	2	6.25
	1	1	1	1	2	2	427.97	427.97	2	1	0	0									32	2	2	2	6.25
	1	1	0	1	2	0			0	0	0	0									33	2	2	2	3.13
	1	1	0	1	2	0			0	0	0	0									35	2	2	2	12.5
	1	1	2	1	1	2	503.37	503.37	2	1	0	0									37	2	2	2	6.25
	1	1	1	1	2	2	653.17	653.17	2	1	0	0									38	2	2	2	3.13
	1	1	1	1	2	2	478.27	478.27	2	1	0	0									39	2	2	2	6.25
	1	1	0	1	2	0			0	0	0	0									40	2	2	2	6.25
	1	1	0	1	1	0			0	0	0	0									41	2	2	2	3.13
	1	1	0	1	2	0			0	0	0	0									42	2	2	2	0
	1	1	0	1	2	0			0	0	0	0									43	2	2	2	3.13
	1	1	0	1	2	0			0	0	0	0									45	2	2	2	3.13
	1	1	0	1	2	0			0	0	0	0									46	2	2	2	0
	1	1	0	1	2	0			0	0	0	0									49	2	2	2	0
	1	1	0	1	1	0			0	0	0	0									51	2	2	2	3.13
	1	1	0	1	2	0			0	0	0	0									52	2	2	2	3.13
	1	1	0	1	2	0			0	0	0	0									53	2	2	2	3.13
	1	1	0	1	1	0			0	0	0	0									56	2	2	2	3.13
	1	1	1	1	2	2	528.07	528.07	2	1	0	0									57	2	2	2	0
	1	1	0	1	1	0			0	0	0	0									58	2	2	1	3.13
	1	1	0	1	1	0			0	0	0	0									59	2	2	1	6.25
	1	1	0	1	1	0			0	0	0	0									60	2	2	2	0
	1	1	1	1	2	2	436.57	436.57	2	1	0	0									61	2	2	2	12.5
	1	1	0	1	2	0			0	0	0	0
	1	1	0	1	1	0			0	0	0	0
	1	1	1	1	2	2	503.17	503.17	2	1	0	0
	1	1	2	1	1	2	411.47	411.47	2	1	0	0
	1	1	0	1	2	0			0	0	0	0
	1	1	0	1	2	0			0	0	0	0
	1	1	0	1	2	0			0	0	0	0
	1	1	1	1	2	2	519.67	519.67	2	1	0	0
	1	1	0	1	1	0			0	0	0	0
	1	1	0	1	2	0			0	0	0	0
	1	1	0	1	1	0			0	0	0	0
	1	1	0	1	1	0			0	0	0	0
	1	1	2	1	1	2	486.67	486.67	2	1	0	0
	1	1	0	1	2	0			0	0	0	0
	1	1	0	1	1	0			0	0	0	0
	1	1	0	1	1	0			0	0	0	0
	1	1	0	1	1	0			0	0	0	0
	1	1	0	1	1	0			0	0	0	0
	1	1	0	1	2	0			0	0	0	0
	1	1	0	1	1	0			0	0	0	0
	1	1	0	1	2	0			0	0	0	0
	1	1	1	1	2	2	428.07	428.07	2	1	0	0
	1	1	0	1	2	0			0	0	0	0
	1	1	0	1	2	0			0	0	0	0
	1	1	0	1	1	0			0	0	0	0
	1	1	0	1	1	0			0	0	0	0
	1	1	0	1	1	0			0	0	0	0
	1	1	0	1	1	0			0	0	0	0
	1	1	0	1	1	0			0	0	0	0
	1	1	2	1	1	2	445.47	445.47	2	1	0	0
	1	1	0	1	2	0			0	0	0	0
	1	1	2	1	1	2	411.67	411.67	2	1	0	0
	1	1	0	1	1	0			0	0	0	0
	1	1	0	1	1	0	319.97	319.97	2	0	0	1
	1	1	0	1	2	0			0	0	0	0
	1	1	2	1	1	2	470.27	470.27	2	1	0	0
	1	1	1	1	2	2	378.17	378.17	2	1	0	0
	1	1	1	1	2	2	428.17	428.17	2	1	0	0
	1	1	0	1	1	0			0	0	0	0
	1	1	0	1	1	0			0	0	0	0
	1	1	0	1	1	0			0	0	0	0
	1	1	0	1	1	0			0	0	0	0
	1	1	0	1	1	0			0	0	0	0
	1	1	0	1	2	0			0	0	0	0
	1	1	2	1	1	2	420.07	420.07	2	1	0	0
	1	1	0	1	2	0			0	0	0	0
	1	1	0	1	2	0			0	0	0	0
	1	1	2	1	1	2	461.77	461.77	2	1	0	0
	1	1	1	1	2	2	461.37	461.37	2	1	0	0
	1	1	1	1	2	2	328.77	328.77	2	1	0	0
	1	1	0	1	2	0			0	0	0	0
	1	1	0	1	2	0			0	0	0	0
	1	1	0	1	1	0			0	0	0	0
	1	1	0	1	1	0			0	0	0	0
	1	1	0	1	1	0			0	0	0	0
	1	1	0	1	2	0			0	0	0	0
	1	1	0	1	2	0			0	0	0	0
	1	1	0	1	1	0			0	0	0	0
	1	1	0	1	2	0			0	0	0	0
	1	1	0	1	1	0			0	0	0	0
	1	1	0	1	2	0			0	0	0	0
	1	1	0	1	1	0			0	0	0	0
	1	1	0	1	2	0			0	0	0	0
	1	1	0	1	2	0			0	0	0	0
	1	1	0	1	2	0			0	0	0	0
	1	1	0	1	2	0			0	0	0	0
	1	1	0	1	2	0			0	0	0	0
	1	1	0	1	2	0			0	0	0	0
	1	1	0	1	2	0			0	0	0	0
	1	1	0	1	1	0			0	0	0	0
	1	1	0	1	1	0			0	0	0	0
	1	1	2	1	1	2	553.87	553.87	2	1	0	0
	1	1	0	1	1	0			0	0	0	0
	1	1	0	1	2	0			0	0	0	0
	1	1	0	1	1	0			0	0	0	0
	1	1	1	1	2	2	470.37	470.37	2	1	0	0
	1	1	0	1	1	0			0	0	0	0
	1	1	0	1	1	0			0	0	0	0
	1	1	0	1	2	0			0	0	0	0
	1	1	0	1	1	0			0	0	0	0
	1	1	0	1	2	0			0	0	0	0
	1	1	0	1	2	0			0	0	0	0
	1	1	2	1	1	2	486.47	486.47	2	1	0	0
	1	1	0	1	1	0			0	0	0	0
	1	1	1	1	2	2	444.97	444.97	2	1	0	0
	1	1	0	1	2	0			0	0	0	0
	1	1	0	1	2	0			0	0	0	0
	1	1	0	1	1	0			0	0	0	0
	1	1	0	1	1	0			0	0	0	0
	1	1	0	1	2	0			0	0	0	0
	1	1	0	1	2	0			0	0	0	0
	1	1	0	1	1	0			0	0	0	0
	1	1	0	1	1	0			0	0	0	0
	1	1	0	1	2	0			0	0	0	0
	1	1	1	1	2	2	470.17	470.17	2	1	0	0
	1	1	0	1	2	0			0	0	0	0
	1	1	0	1	1	0			0	0	0	0
	1	1	0	1	2	0			0	0	0	0
	1	1	0	1	1	0			0	0	0	0
	1	1	0	1	2	0			0	0	0	0
	1	1	0	1	1	0			0	0	0	0
	1	1	0	1	2	0			0	0	0	0
	1	1	0	1	1	0			0	0	0	0
	1	1	0	1	1	0	467.87	467.87	2	0	0	1
	1	1	0	1	2	0			0	0	0	0
	1	1	0	1	2	0			0	0	0	0
	1	1	0	1	2	0			0	0	0	0
	1	1	0	1	2	0			0	0	0	0
	1	1	2	1	1	2	426.17	426.17	2	1	0	0
	1	1	2	1	1	2	509.37	509.37	2	1	0	0
	1	1	0	1	2	0			0	0	0	0
	1	1	0	1	1	0			0	0	0	0
	1	1	0	1	1	0			0	0	0	0
	1	1	1	1	2	2	442.77	442.77	2	1	0	0
	1	1	1	1	2	2	525.87	525.87	2	1	0	0
	1	1	0	1	1	0			0	0	0	0
	1	1	0	1	2	0			0	0	0	0
	1	1	0	1	1	0			0	0	0	0
	1	1	0	1	2	0			0	0	0	0
	1	1	1	1	2	2	492.57	492.57	2	1	0	0
	1	1	0	1	1	0			0	0	0	0
	1	1	0	1	2	0			0	0	0	0
	1	1	0	1	2	0			0	0	0	0
	1	1	0	1	1	0			0	0	0	0
	1	1	0	1	1	0			0	0	0	0
	1	1	0	1	1	0			0	0	0	0
	1	1	0	1	2	0			0	0	0	0
	1	1	1	1	2	2	492.87	492.87	2	1	0	0
	1	1	0	1	2	0			0	0	0	0
	1	1	0	1	2	0			0	0	0	0
	1	1	0	1	2	0			0	0	0	0
	1	1	0	1	1	0			0	0	0	0
	1	1	0	1	2	0			0	0	0	0
	1	1	2	1	1	2	442.67	442.67	2	1	0	0
	1	1	2	1	1	2	559.17	559.17	2	1	0	0
	1	1	0	1	2	0			0	0	0	0
	1	1	0	1	1	0			0	0	0	0
	1	1	0	1	1	0			0	0	0	0
	1	1	0	1	2	0			0	0	0	0
	1	1	2	1	1	2	342.77	342.77	2	1	0	0
	1	1	0	1	1	0			0	0	0	0
	1	1	0	1	1	0			0	0	0	0
	1	1	0	1	1	0			0	0	0	0
	1	1	0	1	2	0			0	0	0	0
	1	1	1	1	2	2	417.77	417.77	2	1	0	0
	1	1	2	1	1	2	450.87	450.87	2	1	0	0
	1	1	2	1	1	2	351.27	351.27	2	1	0	0
	1	1	0	1	1	0			0	0	0	0
	1	1	0	1	1	0			0	0	0	0
	1	1	0	1	2	0			0	0	0	0
	1	1	2	1	1	2	459.47	459.47	2	1	0	0
	1	1	1	1	2	2	400.87	400.87	2	1	0	0
	1	1	0	1	1	0			0	0	0	0
	1	1	0	1	2	0			0	0	0	0
	1	1	0	1	1	0			0	0	0	0
	1	1	0	1	1	0			0	0	0	0
	1	1	0	1	2	0			0	0	0	0
	1	1	0	1	2	0			0	0	0	0
	1	1	0	1	1	0			0	0	0	0
	1	1	1	1	2	2	467.67	467.67	2	1	0	0
	1	1	2	1	1	2	491.97	491.97	2	1	0	0
	1	1	0	1	2	0			0	0	0	0
	1	1	0	1	1	0			0	0	0	0
	1	1	2	1	1	2	367.87	367.87	2	1	0	0
	1	1	0	1	1	0			0	0	0	0
	1	1	2	1	1	2	376.17	376.17	2	1	0	0
	1	1	2	1	1	2	392.37	392.37	2	1	0	0
	1	1	1	1	2	2	484.47	484.47	2	1	0	0
	1	1	0	1	2	0			0	0	0	0
	1	1	0	1	1	0			0	0	0	0
	1	1	1	1	2	2	600.97	600.97	2	1	0	0
	1	1	0	1	1	0			0	0	0	0
	1	1	0	1	1	0			0	0	0	0
	1	1	2	1	1	2	409.37	409.37	2	1	0	0
	1	1	0	1	2	0			0	0	0	0
	1	1	1	1	2	2	634.57	634.57	2	1	0	0
	1	1	0	1	2	0			0	0	0	0
	1	1	0	1	1	0			0	0	0	0
	1	1	1	1	2	2	342.47	342.47	2	1	0	0
	1	1	1	1	2	2	417.57	417.57	2	1	0	0
	1	1	0	1	2	0			0	0	0	0
	1	1	2	1	1	2	384.47	384.47	2	1	0	0
	1	1	1	1	2	2	409.37	409.37	2	1	0	0
	1	1	0	1	1	0			0	0	0	0
	1	1	0	1	1	0			0	0	0	0
	1	1	0	1	1	0			0	0	0	0
	1	1	0	1	2	0			0	0	0	0
	1	1	0	1	1	0			0	0	0	0
	1	2	2	1	1	2	436.47	436.47	2	1	0	0
	1	2	1	1	2	2	486.47	486.47	2	1	0	0
	1	2	1	1	2	2	536.57	536.57	2	1	0	0
	1	2	0	1	2	0			0	0	0	0
	1	2	1	1	2	2	536.67	536.67	2	1	0	0
	1	2	0	1	1	0			0	0	0	0
	1	2	2	1	1	2	328.07	328.07	2	1	0	0
	1	2	0	1	2	0			0	0	0	0
	1	2	2	1	1	2	453.27	453.27	2	1	0	0
	1	2	0	1	2	0			0	0	0	0
	1	2	1	1	2	2	303.27	303.27	2	1	0	0
	1	2	1	1	2	2	444.87	444.87	2	1	0	0
	1	2	1	1	2	2	344.87	344.87	2	1	0	0
	1	2	1	1	2	2	486.77	486.77	2	1	0	0
	1	2	1	1	2	2	444.97	444.97	2	1	0	0
	1	2	2	1	1	2	470.27	470.27	2	1	0	0
	1	2	2	1	1	2	403.17	403.17	2	1	0	0
	1	2	2	1	1	2	428.17	428.17	2	1	0	0
	1	2	0	1	1	0			0	0	0	0
	1	2	1	1	2	2	353.27	353.27	2	1	0	0
	1	2	2	1	1	2	428.27	428.27	2	1	0	0
	1	2	1	1	2	2	361.97	361.97	2	1	0	0
	1	2	0	1	2	0			0	0	0	0
	1	2	1	1	2	2	403.77	403.77	2	1	0	0
	1	2	2	1	1	2	428.17	428.17	2	1	0	0
	1	2	0	1	2	0			0	0	0	0
	1	2	1	1	2	2	336.67	336.67	2	1	0	0
	1	2	1	1	2	2	453.27	453.27	2	1	0	0
	1	2	0	1	1	0			0	0	0	0
	1	2	2	1	1	2	303.47	303.47	2	1	0	0
	1	2	0	1	1	0			0	0	0	0
	1	2	2	1	1	2	320.07	320.07	2	1	0	0
	1	2	1	1	2	2	603.17	603.17	2	1	0	0
	1	2	1	1	2	2	403.17	403.17	2	1	0	0
	1	2	0	1	1	0			0	0	0	0
	1	2	2	1	1	2	353.67	353.67	2	1	0	0
	1	2	1	1	2	2	469.87	469.87	2	1	0	0
	1	2	2	1	1	2	461.47	461.47	2	1	0	0
	1	2	2	1	1	2	403.37	403.37	2	1	0	0
	1	2	1	1	2	2	427.97	427.97	2	1	0	0
	1	2	2	1	1	2	377.87	377.87	2	1	0	0
	1	2	1	1	2	2	444.97	444.97	2	1	0	0
	1	2	2	1	1	2	344.77	344.77	2	1	0	0
	1	2	2	1	1	2	370.07	370.07	2	1	0	0
	1	2	1	1	2	2	336.57	336.57	2	1	0	0
	1	2	2	1	1	2	303.37	303.37	2	1	0	0
	1	2	2	1	1	2	294.57	294.57	2	1	0	0
	1	2	2	1	1	2	402.97	402.97	2	1	0	0
	1	2	2	1	1	2	411.27	411.27	2	1	0	0
	1	2	0	1	1	0	270.67	270.67	2	0	0	1
	1	2	1	1	2	2	478.17	478.17	2	1	0	0
	1	2	2	1	1	2	503.47	503.47	2	1	0	0
	1	2	2	1	1	2	444.87	444.87	2	1	0	0
	1	2	2	1	1	2	428.37	428.37	2	1	0	0
	1	2	2	1	1	2	487.07	487.07	2	1	0	0
	1	2	0	1	1	0			0	0	0	0
	1	2	0	1	1	0			0	0	0	0
	1	2	0	1	1	0			0	0	0	0
	1	2	0	1	2	0			0	0	0	0
	1	2	2	1	1	2	428.17	428.17	2	1	0	0
	1	2	1	1	2	2	570.47	570.47	2	1	0	0
	1	2	2	1	1	2	436.67	436.67	2	1	0	0
	1	2	2	1	1	2	394.67	394.67	2	1	0	0
	1	2	1	1	2	2	328.17	328.17	2	1	0	0
	1	2	2	1	1	2	411.47	411.47	2	1	0	0
	1	2	1	1	2	2	469.87	469.87	2	1	0	0
	1	2	0	1	1	0			0	0	0	0
	1	2	2	1	1	2	411.47	411.47	2	1	0	0
	1	2	0	1	2	0			0	0	0	0
	1	2	1	1	2	2	420.27	420.27	2	1	0	0
	1	2	0	1	2	0			0	0	0	0
	1	2	0	1	2	0			0	0	0	0
	1	2	2	1	1	2	586.77	586.77	2	1	0	0
	1	2	2	1	1	2	453.37	453.37	2	1	0	0
	1	2	0	1	2	0			0	0	0	0
	1	2	0	1	2	0			0	0	0	0
	1	2	2	1	1	2	420.07	420.07	2	1	0	0
	1	2	0	1	2	0			0	0	0	0
	1	2	0	1	1	0			0	0	0	0
	1	2	2	1	1	2	370.57	370.57	2	1	0	0
	1	2	2	1	1	2	528.27	528.27	2	1	0	0
	1	2	1	1	2	2	553.57	553.57	2	1	0	0
	1	2	1	1	2	2	478.17	478.17	2	1	0	0
	1	2	1	1	2	2	361.57	361.57	2	1	0	0
	1	2	2	1	1	2	294.77	294.77	2	1	0	0
	1	2	2	1	1	2	295.37	295.37	2	1	0	0
	1	2	1	1	2	2	286.87	286.87	2	1	0	0
	1	2	1	1	2	2	328.07	328.07	2	1	0	0
	1	2	2	1	1	2	286.97	286.97	2	1	0	0
	1	2	0	1	2	0			0	0	0	0
	1	2	0	1	1	0			0	0	0	0
	1	2	2	1	1	2	378.07	378.07	2	1	0	0
	1	2	1	1	2	2	361.47	361.47	2	1	0	0
	1	2	1	1	2	2	369.87	369.87	2	1	0	0
	1	2	2	1	1	2	336.67	336.67	2	1	0	0
	1	2	0	1	1	0			0	0	0	0
	1	2	1	1	2	2	311.67	311.67	2	1	0	0
	1	2	0	1	2	0			0	0	0	0
	1	2	1	1	2	2	344.77	344.77	2	1	0	0
	1	2	1	1	2	2	511.47	511.47	2	1	0	0
	1	2	1	1	2	2	419.67	419.67	2	1	0	0
	1	2	1	1	2	2	353.87	353.87	2	1	0	0
	1	2	2	1	1	2	444.67	444.67	2	1	0	0
	1	2	1	1	2	2	311.37	311.37	2	1	0	0
	1	2	1	1	2	2	311.57	311.57	2	1	0	0
	1	2	1	1	2	2	277.97	277.97	2	1	0	0
	1	2	0	1	1	0			0	0	0	0
	1	2	1	1	2	2	320.07	320.07	2	1	0	0
	1	2	1	1	2	2	336.67	336.67	2	1	0	0
	1	2	1	1	2	2	294.97	294.97	2	1	0	0
	1	2	1	1	2	2	303.67	303.67	2	1	0	0
	1	2	2	1	1	2	327.87	327.87	2	1	0	0
	1	2	2	1	1	2	361.37	361.37	2	1	0	0
	1	2	2	1	1	2	311.37	311.37	2	1	0	0
	1	2	0	1	2	0			0	0	0	0
	1	2	0	1	2	0			0	0	0	0
	1	2	0	1	1	0			0	0	0	0
	1	2	1	1	2	2	478.27	478.27	2	1	0	0
	1	2	1	1	2	2	353.27	353.27	2	1	0	0
	1	2	0	1	1	0			0	0	0	0
	1	2	1	1	2	2	386.67	386.67	2	1	0	0
	1	2	2	1	1	2	445.07	445.07	2	1	0	0
	1	2	1	1	2	2	403.27	403.27	2	1	0	0
	1	2	1	1	2	2	378.27	378.27	2	1	0	0
	1	2	2	1	1	2	328.07	328.07	2	1	0	0
	1	2	2	1	1	2	303.17	303.17	2	1	0	0
	1	2	2	1	1	2	286.67	286.67	2	1	0	0
	1	2	2	1	1	2	253.57	253.57	2	1	0	0
	2	1	0	1	2	0			0	0	0	0
	2	1	0	1	1	0			0	0	0	0
	2	1	0	1	1	0			0	0	0	0
	2	1	0	1	1	0			0	0	0	0
	2	1	0	1	1	0			0	0	0	0
	2	1	0	1	2	0			0	0	0	0
	2	1	0	1	2	0			0	0	0	0
	2	1	0	1	1	0			0	0	0	0
	2	1	0	1	2	0			0	0	0	0
	2	1	0	1	2	0			0	0	0	0
	2	1	0	1	2	0			0	0	0	0
	2	1	0	1	1	0			0	0	0	0
	2	1	1	1	2	2	494.67	494.67	2	1	0	0
	2	1	0	1	1	0			0	0	0	0
	2	1	0	1	2	0			0	0	0	0
	2	1	0	1	1	0			0	0	0	0
	2	1	0	1	2	0			0	0	0	0
	2	1	0	1	1	0			0	0	0	0
	2	1	0	1	2	0			0	0	0	0
	2	1	0	1	2	0			0	0	0	0
	2	1	0	1	2	0			0	0	0	0
	2	1	0	1	2	0			0	0	0	0
	2	1	0	1	2	0			0	0	0	0
	2	1	0	1	1	0			0	0	0	0
	2	1	0	1	1	0			0	0	0	0
	2	1	0	1	1	0			0	0	0	0
	2	1	2	1	1	2	453.37	453.37	2	1	0	0
	2	1	2	1	1	2	528.17	528.17	2	1	0	0
	2	1	2	1	1	2	436.57	436.57	2	1	0	0
	2	1	0	1	2	0			0	0	0	0
	2	1	2	1	1	2	436.77	436.77	2	1	0	0
	2	1	0	1	2	0			0	0	0	0
	2	1	0	1	1	0			0	0	0	0
	2	1	1	1	2	2	486.77	486.77	2	1	0	0
	2	1	2	1	1	2	511.47	511.47	2	1	0	0
	2	1	2	1	1	2	411.47	411.47	2	1	0	0
	2	1	0	1	1	0			0	0	0	0
	2	1	0	1	1	0			0	0	0	0
	2	1	0	1	1	0			0	0	0	0
	2	1	0	1	1	0			0	0	0	0
	2	1	0	1	2	0			0	0	0	0
	2	1	1	1	2	2	444.77	444.77	2	1	0	0
	2	1	0	1	2	0			0	0	0	0
	2	1	1	1	2	2	394.87	394.87	2	1	0	0
	2	1	0	1	2	0			0	0	0	0
	2	1	0	1	1	0			0	0	0	0
	2	1	0	1	1	0			0	0	0	0
	2	1	0	1	1	0			0	0	0	0
	2	1	0	1	2	0			0	0	0	0
	2	1	1	1	2	2	428.47	428.47	2	1	0	0
	2	1	0	1	2	0			0	0	0	0
	2	1	1	1	2	2	445.17	445.17	2	1	0	0
	2	1	0	1	1	0			0	0	0	0
	2	1	0	1	2	0			0	0	0	0
	2	1	2	1	1	2	453.47	453.47	2	1	0	0
	2	1	0	1	2	0			0	0	0	0
	2	1	0	1	2	0			0	0	0	0
	2	1	0	1	1	0			0	0	0	0
	2	1	0	1	1	0			0	0	0	0
	2	1	0	1	1	0			0	0	0	0
	2	1	2	1	1	2	386.67	386.67	2	1	0	0
	2	1	0	1	1	0			0	0	0	0
	2	1	1	1	2	2	394.97	394.97	2	1	0	0
	2	1	0	1	1	0			0	0	0	0
	2	1	0	1	2	0			0	0	0	0
	2	1	0	1	1	0			0	0	0	0
	2	1	0	1	2	0			0	0	0	0
	2	1	0	1	2	0			0	0	0	0
	2	1	2	1	1	2	394.87	394.87	2	1	0	0
	2	1	0	1	2	0			0	0	0	0
	2	1	2	1	1	2	344.77	344.77	2	1	0	0
	2	1	0	1	2	0			0	0	0	0
	2	1	0	1	1	0			0	0	0	0
	2	1	0	1	2	0			0	0	0	0
	2	1	0	1	2	0			0	0	0	0
	2	1	1	1	2	2	436.47	436.47	2	1	0	0
	2	1	2	1	1	2	561.77	561.77	2	1	0	0
	2	1	0	1	2	0			0	0	0	0
	2	1	0	1	1	0			0	0	0	0
	2	1	0	1	1	0			0	0	0	0
	2	1	0	1	2	0			0	0	0	0
	2	1	0	1	1	0			0	0	0	0
	2	1	0	1	2	0			0	0	0	0
	2	1	0	1	1	0			0	0	0	0
	2	1	1	1	2	2	553.27	553.27	2	1	0	0
	2	1	0	1	2	0			0	0	0	0
	2	1	0	1	2	0			0	0	0	0
	2	1	1	1	2	2	386.57	386.57	2	1	0	0
	2	1	0	1	1	0			0	0	0	0
	2	1	2	1	1	2	378.17	378.17	2	1	0	0
	2	1	0	1	2	0			0	0	0	0
	2	1	0	1	1	0			0	0	0	0
	2	1	0	1	1	0			0	0	0	0
	2	1	0	1	2	0			0	0	0	0
	2	1	0	1	1	0			0	0	0	0
	2	1	0	1	2	0			0	0	0	0
	2	1	0	1	1	0			0	0	0	0
	2	1	0	1	2	0			0	0	0	0
	2	1	1	1	2	2	444.97	444.97	2	1	0	0
	2	1	0	1	2	0			0	0	0	0
	2	1	0	1	2	0			0	0	0	0
	2	1	0	1	1	0			0	0	0	0
	2	1	2	1	1	2	411.47	411.47	2	1	0	0
	2	1	0	1	1	0			0	0	0	0
	2	1	0	1	1	0			0	0	0	0
	2	1	2	1	1	2	461.47	461.47	2	1	0	0
	2	1	0	1	2	0			0	0	0	0
	2	1	0	1	1	0			0	0	0	0
	2	1	0	1	1	0			0	0	0	0
	2	1	0	1	1	0			0	0	0	0
	2	1	0	1	1	0			0	0	0	0
	2	1	2	1	1	2	420.17	420.17	2	1	0	0
	2	1	1	1	2	2	403.47	403.47	2	1	0	0
	2	1	0	1	2	0			0	0	0	0
	2	1	0	1	2	0			0	0	0	0
	2	1	1	1	2	2	369.97	369.97	2	1	0	0
	2	1	1	1	2	2	394.77	394.77	2	1	0	0
	2	1	0	1	2	0	303.17	303.17	2	0	0	1
	2	1	1	1	2	2		111.17	2	1	0	0
	2	1	0	1	2	0			0	0	0	0
	2	1	2	1	1	2	386.57	386.57	2	1	0	0
	2	1	0	1	1	0			0	0	0	0
	2	1	0	1	2	0			0	0	0	0
	2	1	0	1	1	0			0	0	0	0
	2	1	0	1	1	0			0	0	0	0
	2	1	0	1	2	0			0	0	0	0
	2	1	0	1	1	0			0	0	0	0
	2	1	1	1	2	2	445.17	445.17	2	1	0	0
	2	1	0	1	2	0			0	0	0	0
	2	1	1	1	2	2	311.67	311.67	2	1	0	0
	2	1	1	1	2	2	461.57	461.57	2	1	0	0
	2	1	0	1	2	0			0	0	0	0
	2	1	0	1	1	0			0	0	0	0
	2	1	2	1	1	2	445.07	445.07	2	1	0	0
	2	1	0	1	1	0			0	0	0	0
	2	1	0	1	2	0			0	0	0	0
	2	1	2	1	1	2	336.77	336.77	2	1	0	0
	2	1	0	1	2	0			0	0	0	0
	2	1	1	1	2	2	294.97	294.97	2	1	0	0
	2	1	0	1	2	0			0	0	0	0
	2	1	1	1	2	2	311.57	311.57	2	1	0	0
	2	1	0	1	2	0			0	0	0	0
	2	1	0	1	2	0	311.27	311.27	2	0	0	1
	2	1	0	1	1	0			0	0	0	0
	2	1	1	1	2	2	494.87	494.87	2	1	0	0
	2	1	0	1	2	0			0	0	0	0
	2	1	0	1	2	0			0	0	0	0
	2	1	0	1	2	0			0	0	0	0
	2	1	0	1	2	0			0	0	0	0
	2	1	2	1	1	2	361.57	361.57	2	1	0	0
	2	1	0	1	1	0			0	0	0	0
	2	1	1	1	2	2	386.47	386.47	2	1	0	0
	2	1	0	1	1	0			0	0	0	0
	2	1	0	1	1	0			0	0	0	0
	2	1	2	1	1	2	328.27	328.27	2	1	0	0
	2	1	0	1	1	0			0	0	0	0
	2	1	0	1	2	0			0	0	0	0
	2	1	0	1	2	0			0	0	0	0
	2	1	1	1	2	2	370.07	370.07	2	1	0	0
	2	1	0	1	1	0			0	0	0	0
	2	1	2	1	1	2	344.97	344.97	2	1	0	0
	2	1	0	1	2	0			0	0	0	0
	2	1	1	1	2	2	378.17	378.17	2	1	0	0
	2	1	0	1	1	0			0	0	0	0
	2	1	0	1	2	0			0	0	0	0
	2	1	2	1	1	2	453.77	453.77	2	1	0	0
	2	1	2	1	1	2	453.47	453.47	2	1	0	0
	2	1	0	1	2	0			0	0	0	0
	2	1	0	1	1	0			0	0	0	0
	2	1	0	1	1	0			0	0	0	0
	2	1	0	1	2	0			0	0	0	0
	2	1	0	1	1	0			0	0	0	0
	2	1	0	1	1	0			0	0	0	0
	2	1	0	1	2	0			0	0	0	0
	2	1	0	1	2	0			0	0	0	0
	2	1	1	1	2	2	445.07	445.07	2	1	0	0
	2	1	0	1	2	0			0	0	0	0
	2	1	0	1	2	0			0	0	0	0
	2	1	0	1	2	0			0	0	0	0
	2	1	0	1	2	0			0	0	0	0
	2	1	0	1	1	0			0	0	0	0
	2	1	0	1	2	0			0	0	0	0
	2	1	1	1	2	2	336.67	336.67	2	1	0	0
	2	1	0	1	1	0			0	0	0	0
	2	1	1	1	2	2	378.37	378.37	2	1	0	0
	2	1	0	1	1	0			0	0	0	0
	2	1	0	1	2	0			0	0	0	0
	2	1	1	1	2	2	428.27	428.27	2	1	0	0
	2	1	0	1	2	0			0	0	0	0
	2	1	2	1	1	2	420.07	420.07	2	1	0	0
	2	1	0	1	1	0			0	0	0	0
	2	1	0	1	1	0			0	0	0	0
	2	1	0	1	1	0			0	0	0	0
	2	1	0	1	1	0			0	0	0	0
	2	1	0	1	2	0			0	0	0	0
	2	1	2	1	1	2	461.67	461.67	2	1	0	0
	2	1	0	1	2	0			0	0	0	0
	2	1	1	1	2	2	436.67	436.67	2	1	0	0
	2	1	0	1	1	0			0	0	0	0
	2	1	0	1	2	0			0	0	0	0
	2	1	2	1	1	2	311.67	311.67	2	1	0	0
	2	1	0	1	1	0			0	0	0	0
	2	1	0	1	2	0			0	0	0	0
	2	1	0	1	2	0			0	0	0	0
	2	1	0	1	2	0			0	0	0	0
	2	1	0	1	1	0			0	0	0	0
	2	1	0	1	2	0			0	0	0	0
	2	1	0	1	1	0			0	0	0	0
	2	1	0	1	1	0			0	0	0	0
	2	1	0	1	1	0			0	0	0	0
	2	1	0	1	2	0			0	0	0	0
	2	1	0	1	2	0			0	0	0	0
	2	1	0	1	1	0			0	0	0	0
	2	1	0	1	1	0			0	0	0	0
	2	1	0	1	1	0			0	0	0	0
	2	1	0	1	1	0			0	0	0	0
	2	1	1	1	2	2	453.47	453.47	2	1	0	0
	2	1	0	1	2	0			0	0	0	0
	2	1	0	1	2	0			0	0	0	0
	2	1	2	1	1	2	345.07	345.07	2	1	0	0
	2	1	0	1	1	0			0	0	0	0
	2	1	0	1	2	0			0	0	0	0
	2	1	0	1	2	0			0	0	0	0
	2	1	0	1	1	0			0	0	0	0
	2	1	2	1	1	2	528.27	528.27	2	1	0	0
	2	1	0	1	2	0			0	0	0	0
	2	1	0	1	2	0			0	0	0	0
	2	1	2	1	1	2	403.57	403.57	2	1	0	0
	2	1	0	1	2	0			0	0	0	0
	2	1	1	1	2	2	336.77	336.77	2	1	0	0
	2	1	2	1	1	2	503.37	503.37	2	1	0	0
	2	1	0	1	1	0			0	0	0	0
	2	1	0	1	2	0			0	0	0	0
	2	1	0	1	1	0			0	0	0	0
	2	1	0	1	1	0			0	0	0	0
	2	1	0	1	1	0			0	0	0	0
	2	1	0	1	2	0			0	0	0	0
	2	1	0	1	1	0			0	0	0	0
	2	1	0	1	1	0			0	0	0	0
	2	1	0	1	1	0			0	0	0	0
	2	1	0	1	1	0			0	0	0	0
	2	1	0	1	2	0			0	0	0	0
	2	1	2	1	1	2	420.17	420.17	2	1	0	0
	2	1	0	1	2	0			0	0	0	0
	2	1	0	1	1	0			0	0	0	0
	2	1	0	1	2	0			0	0	0	0
	2	1	0	1	1	0			0	0	0	0
	2	1	0	1	1	0			0	0	0	0
	2	1	0	1	1	0			0	0	0	0
	2	1	0	1	1	0			0	0	0	0
	2	1	0	1	1	0			0	0	0	0
	2	1	0	1	1	0			0	0	0	0
	2	1	0	1	1	0			0	0	0	0
	2	1	2	1	1	2	487.17	487.17	2	1	0	0
	2	1	1	1	2	2	494.67	494.67	2	1	0	0
	2	1	0	1	2	0			0	0	0	0
	2	1	0	1	1	0			0	0	0	0
	2	1	0	1	2	0			0	0	0	0
	2	1	2	1	1	2	428.27	428.27	2	1	0	0
	2	1	0	1	2	0			0	0	0	0
	2	1	0	1	1	0			0	0	0	0
	2	1	0	1	1	0			0	0	0	0
	2	1	1	1	2	2	361.57	361.57	2	1	0	0
	2	1	2	1	1	2	453.07	453.07	2	1	0	0
	2	1	1	1	2	2	394.97	394.97	2	1	0	0
	2	1	0	1	1	0			0	0	0	0
	2	1	0	1	1	0			0	0	0	0
	2	1	0	1	1	0			0	0	0	0
	2	1	0	1	1	0			0	0	0	0
	2	1	2	1	1	2	336.47	336.47	2	1	0	0
	2	1	0	1	2	0			0	0	0	0
	2	1	0	1	1	0			0	0	0	0
	2	1	0	1	2	0			0	0	0	0
	2	1	1	1	2	2	394.77	394.77	2	1	0	0
	2	1	0	1	2	0			0	0	0	0
	2	1	0	1	1	0			0	0	0	0
	2	1	0	1	2	0			0	0	0	0
	2	1	0	1	2	0			0	0	0	0
	2	1	1	1	2	2	445.07	445.07	2	1	0	0
	2	1	0	1	2	0			0	0	0	0
	2	1	0	1	1	0			0	0	0	0
	2	1	0	1	1	0			0	0	0	0
	2	1	0	1	2	0			0	0	0	0
	2	1	0	1	1	0			0	0	0	0
	2	1	1	1	2	2	361.57	361.57	2	1	0	0
	2	1	0	1	1	0			0	0	0	0
	2	1	0	1	2	0			0	0	0	0
	2	1	0	1	2	0			0	0	0	0
	2	1	0	1	2	0			0	0	0	0
	2	1	0	1	2	0			0	0	0	0
	2	1	0	1	1	0			0	0	0	0
	2	1	2	1	1	2	436.67	436.67	2	1	0	0
	2	1	2	1	1	2	536.37	536.37	2	1	0	0
	2	1	0	1	1	0			0	0	0	0
	2	1	2	1	1	2	428.17	428.17	2	1	0	0
	2	1	0	1	1	0			0	0	0	0
	2	1	0	1	2	0			0	0	0	0
	2	1	0	1	2	0			0	0	0	0
	2	1	1	1	2	2	419.97	419.97	2	1	0	0
	2	1	1	1	2	2	419.87	419.87	2	1	0	0
	2	1	0	1	1	0			0	0	0	0
	2	1	0	1	2	0			0	0	0	0
	2	1	0	1	1	0			0	0	0	0
	2	1	0	1	1	0			0	0	0	0
	2	1	0	1	1	0			0	0	0	0
	2	1	1	1	2	2	461.47	461.47	2	1	0	0
	2	1	2	1	1	2	469.87	469.87	2	1	0	0
	2	1	0	1	2	0			0	0	0	0
	2	1	0	1	1	0			0	0	0	0
	2	1	0	1	1	0			0	0	0	0
	2	1	0	1	2	0			0	0	0	0
	2	1	2	1	1	2	370.07	370.07	2	1	0	0
	2	1	0	1	1	0			0	0	0	0
	2	1	0	1	1	0			0	0	0	0
	2	1	0	1	1	0			0	0	0	0
	2	1	0	1	2	0			0	0	0	0
	2	1	0	1	2	0			0	0	0	0
	2	1	0	1	2	0			0	0	0	0
	2	1	0	1	2	0			0	0	0	0
	2	1	0	1	1	0			0	0	0	0
	2	1	0	1	1	0			0	0	0	0
	2	1	0	1	1	0			0	0	0	0
	2	1	2	1	1	2	453.57	453.57	2	1	0	0
	2	1	0	1	1	0			0	0	0	0
	2	1	2	1	1	2	370.17	370.17	2	1	0	0
	2	1	0	1	1	0			0	0	0	0
	2	1	0	1	1	0			0	0	0	0
	2	1	0	1	1	0			0	0	0	0
	2	1	0	1	2	0			0	0	0	0
	2	1	0	1	2	0			0	0	0	0
	2	1	0	1	2	0			0	0	0	0
	2	1	1	1	2	2	462.07	462.07	2	1	0	0
	2	1	0	1	2	0			0	0	0	0
	2	1	0	1	1	0			0	0	0	0
	2	1	1	1	2	2	361.57	361.57	2	1	0	0
	2	1	0	1	1	0			0	0	0	0
	2	1	0	1	2	0			0	0	0	0
	2	1	0	1	1	0			0	0	0	0
	2	1	0	1	2	0			0	0	0	0
	2	1	2	1	1	2	461.57	461.57	2	1	0	0
	2	1	0	1	1	0			0	0	0	0
	2	1	0	1	2	0			0	0	0	0
	2	1	0	1	2	0			0	0	0	0
	2	1	2	1	1	2	370.47	370.47	2	1	0	0
	2	1	1	1	2	2	486.77	486.77	2	1	0	0
	2	1	1	1	2	2	394.67	394.67	2	1	0	0
	2	1	2	1	1	2	378.07	378.07	2	1	0	0
	2	1	0	1	2	0	277.97	277.97	2	0	0	1
	2	1	0	1	1	0			0	0	0	0
	2	1	0	1	2	0			0	0	0	0
	2	1	0	1	2	0			0	0	0	0
	2	1	0	1	1	0			0	0	0	0
	2	1	2	1	1	2	328.27	328.27	2	1	0	0
	2	1	0	1	2	0			0	0	0	0
	2	1	0	1	1	0			0	0	0	0
	2	1	0	1	2	0			0	0	0	0
	2	1	0	1	2	0			0	0	0	0
	2	1	0	1	2	0			0	0	0	0
	2	1	2	1	1	2	353.27	353.27	2	1	0	0
	2	1	1	1	2	2	444.87	444.87	2	1	0	0
	2	1	0	1	2	0			0	0	0	0
	2	1	0	1	2	0			0	0	0	0
	2	1	1	1	2	2	361.47	361.47	2	1	0	0
	2	1	0	1	2	0			0	0	0	0
	2	1	0	1	1	0			0	0	0	0
	2	1	0	1	2	0			0	0	0	0
	2	1	2	1	1	2	428.57	428.57	2	1	0	0
	2	1	1	1	2	2	494.77	494.77	2	1	0	0
	2	1	0	1	1	0			0	0	0	0
	2	1	0	1	1	0			0	0	0	0
	2	1	0	1	2	0			0	0	0	0
	2	1	0	1	2	0			0	0	0	0
	2	1	0	1	1	0			0	0	0	0
	2	1	0	1	2	0			0	0	0	0
	2	1	0	1	1	0			0	0	0	0
	2	1	0	1	1	0			0	0	0	0
	2	1	0	1	1	0			0	0	0	0
	2	1	0	1	1	0			0	0	0	0
	2	1	1	1	2	2			0	0	0	0
	2	1	0	1	1	0			0	0	0	0
	2	1	0	1	2	0			0	0	0	0
	2	1	0	1	2	0			0	0	0	0
	2	1	0	1	2	0			0	0	0	0
	2	1	0	1	2	0			0	0	0	0
	2	2	0	1	2	0	637.07	637.07	2	0	0	1
	2	2	0	1	2	0			0	0	0	0
	2	2	0	1	2	0			0	0	0	0
	2	2	0	1	1	0			0	0	0	0
	2	2	1	1	2	2	453.17	453.17	2	1	0	0
	2	2	1	1	2	2	436.77	436.77	2	1	0	0
	2	2	1	1	2	2	386.67	386.67	2	1	0	0
	2	2	1	1	2	2	394.97	394.97	2	1	0	0
	2	2	2	1	1	2	336.57	336.57	2	1	0	0
	2	2	1	1	2	2	394.87	394.87	2	1	0	0
	2	2	2	1	1	2	320.47	320.47	2	1	0	0
	2	2	2	1	1	2	311.57	311.57	2	1	0	0
	2	2	1	1	2	2	303.47	303.47	2	1	0	0
	2	2	2	1	1	2	370.07	370.07	2	1	0	0
	2	2	2	1	1	2	261.57	261.57	2	1	0	0
	2	2	1	1	2	2			0	0	0	0
	2	2	0	1	2	0	236.67	236.67	2	0	0	1
	2	2	2	1	1	2	619.67	619.67	2	1	0	0
	2	2	2	1	1	2	311.47	311.47	2	1	0	0
	2	2	2	1	1	2	328.07	328.07	2	1	0	0
	2	2	0	1	2	0			0	0	0	0
	2	2	0	1	1	0			0	0	0	0
	2	2	0	1	1	0			0	0	0	0
	2	2	1	1	2	2	319.77	319.77	2	1	0	0
	2	2	1	1	2	2	269.87	269.87	2	1	0	0
	2	2	2	1	1	2	303.17	303.17	2	1	0	0
	2	2	1	1	2	2	470.17	470.17	2	1	0	0
	2	2	2	1	1	2	336.57	336.57	2	1	0	0
	2	2	1	1	2	2	420.17	420.17	2	1	0	0
	2	2	2	1	1	2	478.27	478.27	2	1	0	0
	2	2	2	1	1	2	361.57	361.57	2	1	0	0
	2	2	0	1	2	0			0	0	0	0
	2	2	0	1	1	0			0	0	0	0
	2	2	0	1	1	0			0	0	0	0
	2	2	1	1	2	2	361.57	361.57	2	1	0	0
	2	2	2	1	1	2	478.17	478.17	2	1	0	0
	2	2	0	1	1	0			0	0	0	0
	2	2	1	1	2	2	328.07	328.07	2	1	0	0
	2	2	2	1	1	2	411.57	411.57	2	1	0	0
	2	2	0	1	2	0			0	0	0	0
	2	2	2	1	1	2	395.07	395.07	2	1	0	0
	2	2	2	1	1	2	303.27	303.27	2	1	0	0
	2	2	0	1	1	0			0	0	0	0
	2	2	2	1	1	2	336.57	336.57	2	1	0	0
	2	2	0	1	2	0			0	0	0	0
	2	2	2	1	1	2	311.37	311.37	2	1	0	0
	2	2	2	1	1	2	361.57	361.57	2	1	0	0
	2	2	2	1	1	2	361.37	361.37	2	1	0	0
	2	2	1	1	2	2	361.47	361.47	2	1	0	0
	2	2	2	1	1	2	311.47	311.47	2	1	0	0
	2	2	2	1	1	2	286.67	286.67	2	1	0	0
	2	2	0	1	1	0			0	0	0	0
	2	2	1	1	2	2	386.87	386.87	2	1	0	0
	2	2	2	1	1	2	395.07	395.07	2	1	0	0
	2	2	0	1	1	0			0	0	0	0
	2	2	2	1	1	2	328.67	328.67	2	1	0	0
	2	2	1	1	2	2	336.57	336.57	2	1	0	0
	2	2	2	1	1	2	319.97	319.97	2	1	0	0
	2	2	1	1	2	2	294.77	294.77	2	1	0	0
	2	2	1	1	2	2	320.27	320.27	2	1	0	0
	2	2	1	1	2	2	444.77	444.77	2	1	0	0
	2	2	2	1	1	2	361.47	361.47	2	1	0	0
	2	2	1	1	2	2	328.07	328.07	2	1	0	0
	2	2	1	1	2	2	303.27	303.27	2	1	0	0
	2	2	2	1	1	2	294.87	294.87	2	1	0	0
	2	2	0	1	1	0			0	0	0	0
	2	2	1	1	2	2	444.87	444.87	2	1	0	0
	2	2	1	1	2	2	353.07	353.07	2	1	0	0
	2	2	1	1	2	2	378.27	378.27	2	1	0	0
	2	2	2	1	1	2	336.77	336.77	2	1	0	0
	2	2	1	1	2	2			0	0	0	0
	2	2	0	1	1	0			0	0	0	0
	2	2	0	1	2	0			0	0	0	0
	2	2	0	1	1	0			0	0	0	0
	2	2	2	1	1	2	378.27	378.27	2	1	0	0
	2	2	0	1	2	0			0	0	0	0
	2	2	0	1	2	0			0	0	0	0
	2	2	2	1	1	2	344.87	344.87	2	1	0	0
	2	2	0	1	1	0			0	0	0	0
	2	2	2	1	1	2	328.27	328.27	2	1	0	0
	2	2	1	1	2	2	453.27	453.27	2	1	0	0
	2	2	2	1	1	2	336.47	336.47	2	1	0	0
	2	2	2	1	1	2	328.37	328.37	2	1	0	0
	2	2	2	1	1	2	319.67	319.67	2	1	0	0
	2	2	2	1	1	2	344.67	344.67	2	1	0	0
	2	2	1	1	2	2	286.57	286.57	2	1	0	0
	2	2	1	1	2	2	319.87	319.87	2	1	0	0
	2	2	0	1	1	0			0	0	0	0
	2	2	1	1	2	2	320.07	320.07	2	1	0	0
	2	2	2	1	1	2	328.27	328.27	2	1	0	0
	2	2	2	1	1	2	394.97	394.97	2	1	0	0
	2	2	1	1	2	2	344.87	344.87	2	1	0	0
	2	2	1	1	2	2	311.47	311.47	2	1	0	0
	2	2	0	1	2	0			0	0	0	0
	2	2	1	1	2	2	336.67	336.67	2	1	0	0
	2	2	0	1	2	0			0	0	0	0
	2	2	0	1	1	0			0	0	0	0
	2	2	2	1	1	2	311.57	311.57	2	1	0	0
	2	2	2	1	1	2	328.07	328.07	2	1	0	0
	2	2	1	1	2	2	361.47	361.47	2	1	0	0
	2	2	0	1	2	0			0	0	0	0
	2	2	1	1	2	2	336.87	336.87	2	1	0	0
	2	2	1	1	2	2	328.17	328.17	2	1	0	0
	2	2	1	1	2	2	419.67	419.67	2	1	0	0
	2	2	2	1	1	2	370.07	370.07	2	1	0	0
	2	2	1	1	2	2	320.07	320.07	2	1	0	0
	2	2	1	1	2	2	328.17	328.17	2	1	0	0
	2	2	2	1	1	2	353.97	353.97	2	1	0	0
	2	2	1	1	2	2	320.17	320.17	2	1	0	0
	2	2	1	1	2	2	378.17	378.17	2	1	0	0
	2	2	1	1	2	2	336.57	336.57	2	1	0	0
	2	2	2	1	1	2	303.17	303.17	2	1	0	0
	2	2	0	1	1	0			0	0	0	0
	2	2	2	1	1	2	370.07	370.07	2	1	0	0
	2	2	2	1	1	2	419.77	419.77	2	1	0	0
	2	2	1	1	2	2	361.47	361.47	2	1	0	0
	2	2	2	1	1	2	319.97	319.97	2	1	0	0
	2	2	1	1	2	2	328.27	328.27	2	1	0	0
	2	2	1	1	2	2	394.57	394.57	2	1	0	0
	2	2	1	1	2	2	294.57	294.57	2	1	0	0
	2	2	2	1	1	2	303.27	303.27	2	1	0	0
	2	2	0	1	2	0			0	0	0	0
	2	2	1	1	2	2	328.27	328.27	2	1	0	0
	2	2	1	1	2	2	361.37	361.37	2	1	0	0
	2	2	2	1	1	2	311.37	311.37	2	1	0	0
	2	2	2	1	1	2	319.67	319.67	2	1	0	0
	2	2	1	1	2	2	319.87	319.87	2	1	0	0
	2	2	0	1	2	0			0	0	0	0
	3	1	0	1	1	0			0	0	0	0
	3	1	0	1	2	0			0	0	0	0
	3	1	2	1	1	2	561.47	561.47	2	1	0	0
	3	1	0	1	2	0			0	0	0	0
	3	1	0	1	2	0			0	0	0	0
	3	1	1	1	2	2	386.77	386.77	2	1	0	0
	3	1	0	1	2	0			0	0	0	0
	3	1	1	1	2	2	428.17	428.17	2	1	0	0
	3	1	0	1	2	0			0	0	0	0
	3	1	0	1	1	0			0	0	0	0
	3	1	0	1	2	0			0	0	0	0
	3	1	1	1	2	2	361.47	361.47	2	1	0	0
	3	1	0	1	2	0			0	0	0	0
	3	1	0	1	2	0			0	0	0	0
	3	1	0	1	1	0			0	0	0	0
	3	1	0	1	1	0			0	0	0	0
	3	1	0	1	2	0			0	0	0	0
	3	1	2	1	1	2	428.47	428.47	2	1	0	0
	3	1	0	1	1	0			0	0	0	0
	3	1	0	1	2	0			0	0	0	0
	3	1	0	1	1	0			0	0	0	0
	3	1	1	1	2	2	386.87	386.87	2	1	0	0
	3	1	0	1	2	0			0	0	0	0
	3	1	0	1	2	0			0	0	0	0
	3	1	0	1	1	0			0	0	0	0
	3	1	0	1	2	0			0	0	0	0
	3	1	0	1	1	0			0	0	0	0
	3	1	0	1	1	0			0	0	0	0
	3	1	2	1	1	2	428.07	428.07	2	1	0	0
	3	1	0	1	1	0			0	0	0	0
	3	1	0	1	1	0			0	0	0	0
	3	1	0	1	1	0			0	0	0	0
	3	1	0	1	1	0			0	0	0	0
	3	1	1	1	2	2	419.97	419.97	2	1	0	0
	3	1	0	1	2	0			0	0	0	0
	3	1	0	1	1	0			0	0	0	0
	3	1	0	1	2	0			0	0	0	0
	3	1	1	1	2	2	494.87	494.87	2	1	0	0
	3	1	0	1	1	0			0	0	0	0
	3	1	1	1	2	2	428.17	428.17	2	1	0	0
	3	1	0	1	2	0			0	0	0	0
	3	1	0	1	1	0			0	0	0	0
	3	1	0	1	2	0			0	0	0	0
	3	1	0	1	1	0			0	0	0	0
	3	1	0	1	2	0			0	0	0	0
	3	1	1	1	2	2	436.97	436.97	2	1	0	0
	3	1	0	1	2	0			0	0	0	0
	3	1	1	1	2	2	428.17	428.17	2	1	0	0
	3	1	0	1	1	0			0	0	0	0
	3	1	0	1	1	0			0	0	0	0
	3	1	0	1	1	0			0	0	0	0
	3	1	0	1	2	0			0	0	0	0
	3	1	0	1	2	0			0	0	0	0
	3	1	2	1	1	2	444.67	444.67	2	1	0	0
	3	1	0	1	1	0			0	0	0	0
	3	1	0	1	2	0			0	0	0	0
	3	1	2	1	1	2	428.27	428.27	2	1	0	0
	3	1	0	1	2	0			0	0	0	0
	3	1	0	1	1	0			0	0	0	0
	3	1	0	1	2	0			0	0	0	0
	3	1	0	1	2	0			0	0	0	0
	3	1	1	1	2	2	436.67	436.67	2	1	0	0
	3	1	2	1	1	2	419.77	419.77	2	1	0	0
	3	1	0	1	1	0			0	0	0	0
	3	1	0	1	1	0			0	0	0	0
	3	1	1	1	2	2	428.07	428.07	2	1	0	0
	3	1	0	1	1	0			0	0	0	0
	3	1	0	1	2	0			0	0	0	0
	3	1	0	1	1	0			0	0	0	0
	3	1	0	1	2	0			0	0	0	0
	3	1	0	1	2	0			0	0	0	0
	3	1	0	1	1	0			0	0	0	0
	3	1	2	1	1	2	453.27	453.27	2	1	0	0
	3	1	0	1	1	0			0	0	0	0
	3	1	0	1	2	0			0	0	0	0
	3	1	0	1	2	0			0	0	0	0
	3	1	0	1	2	0			0	0	0	0
	3	1	0	1	1	0			0	0	0	0
	3	1	0	1	2	0			0	0	0	0
	3	1	2	1	1	2	453.27	453.27	2	1	0	0
	3	1	0	1	2	0			0	0	0	0
	3	1	0	1	2	0			0	0	0	0
	3	1	0	1	2	0			0	0	0	0
	3	1	2	1	1	2	444.87	444.87	2	1	0	0
	3	1	2	1	1	2	378.17	378.17	2	1	0	0
	3	1	0	1	2	0			0	0	0	0
	3	1	2	1	1	2	395.07	395.07	2	1	0	0
	3	1	0	1	2	0			0	0	0	0
	3	1	0	1	1	0			0	0	0	0
	3	1	0	1	2	0			0	0	0	0
	3	1	0	1	1	0			0	0	0	0
	3	1	0	1	2	0			0	0	0	0
	3	1	0	1	1	0			0	0	0	0
	3	1	2	1	1	2	461.47	461.47	2	1	0	0
	3	1	0	1	2	0			0	0	0	0
	3	1	1	1	2	2	403.37	403.37	2	1	0	0
	3	1	0	1	1	0			0	0	0	0
	3	1	0	1	2	0			0	0	0	0
	3	1	2	1	1	2	378.47	378.47	2	1	0	0
	3	1	1	1	2	2	361.47	361.47	2	1	0	0
	3	1	0	1	1	0			0	0	0	0
	3	1	2	1	1	2	403.37	403.37	2	1	0	0
	3	1	0	1	1	0			0	0	0	0
	3	1	0	1	2	0			0	0	0	0
	3	1	0	1	2	0			0	0	0	0
	3	1	0	1	1	0			0	0	0	0
	3	1	1	1	2	2	419.97	419.97	2	1	0	0
	3	1	0	1	1	0			0	0	0	0
	3	1	0	1	1	0			0	0	0	0
	3	1	0	1	1	0			0	0	0	0
	3	1	0	1	1	0			0	0	0	0
	3	1	1	1	2	2	486.67	486.67	2	1	0	0
	3	1	0	1	1	0			0	0	0	0
	3	1	0	1	2	0			0	0	0	0
	3	1	0	1	2	0			0	0	0	0
	3	1	0	1	1	0			0	0	0	0
	3	1	1	1	2	2	453.47	453.47	2	1	0	0
	3	1	2	1	1	2	436.67	436.67	2	1	0	0
	3	1	0	1	1	0			0	0	0	0
	3	1	0	1	1	0			0	0	0	0
	3	1	0	1	1	0			0	0	0	0
	3	1	0	1	1	0			0	0	0	0
	3	1	0	1	2	0			0	0	0	0
	3	1	0	1	2	0			0	0	0	0
	3	1	0	1	1	0			0	0	0	0
	3	1	2	1	1	2	511.27	511.27	2	1	0	0
	3	1	0	1	1	0			0	0	0	0
	3	1	0	1	2	0			0	0	0	0
	3	1	0	1	2	0			0	0	0	0
	3	1	1	1	2	2	503.67	503.67	2	1	0	0
	3	1	0	1	2	0			0	0	0	0
	3	1	0	1	1	0			0	0	0	0
	3	1	0	1	2	0			0	0	0	0
	3	1	1	1	2	2	420.07	420.07	2	1	0	0
	3	1	0	1	2	0			0	0	0	0
	3	1	0	1	1	0			0	0	0	0
	3	1	0	1	2	0			0	0	0	0
	3	1	2	1	1	2	428.17	428.17	2	1	0	0
	3	1	1	1	2	2	403.27	403.27	2	1	0	0
	3	1	0	1	1	0			0	0	0	0
	3	1	0	1	1	0			0	0	0	0
	3	1	0	1	1	0			0	0	0	0
	3	1	0	1	2	0			0	0	0	0
	3	1	0	1	1	0			0	0	0	0
	3	1	0	1	2	0			0	0	0	0
	3	1	0	1	2	0			0	0	0	0
	3	1	0	1	2	0			0	0	0	0
	3	1	2	1	1	2	470.07	470.07	2	1	0	0
	3	1	0	1	2	0			0	0	0	0
	3	1	0	1	2	0			0	0	0	0
	3	1	1	1	2	2	411.67	411.67	2	1	0	0
	3	1	0	1	1	0			0	0	0	0
	3	1	0	1	1	0			0	0	0	0
	3	1	0	1	2	0			0	0	0	0
	3	1	0	1	1	0			0	0	0	0
	3	1	1	1	2	2	444.77	444.77	2	1	0	0
	3	1	0	1	2	0			0	0	0	0
	3	1	0	1	1	0			0	0	0	0
	3	1	0	1	2	0			0	0	0	0
	3	1	1	1	2	2	428.17	428.17	2	1	0	0
	3	1	1	1	2	2	444.87	444.87	2	1	0	0
	3	1	0	1	2	0			0	0	0	0
	3	1	0	1	2	0			0	0	0	0
	3	1	1	1	2	2	378.27	378.27	2	1	0	0
	3	1	0	1	1	0			0	0	0	0
	3	1	2	1	1	2	411.57	411.57	2	1	0	0
	3	1	0	1	2	0			0	0	0	0
	3	1	1	1	2	2	353.67	353.67	2	1	0	0
	3	1	0	1	1	0			0	0	0	0
	3	1	0	1	2	0			0	0	0	0
	3	1	0	1	2	0			0	0	0	0
	3	1	0	1	1	0			0	0	0	0
	3	1	0	1	1	0			0	0	0	0
	3	1	0	1	1	0			0	0	0	0
	3	1	0	1	2	0			0	0	0	0
	3	1	2	1	1	2	428.17	428.17	2	1	0	0
	3	1	0	1	2	0			0	0	0	0
	3	1	0	1	1	0			0	0	0	0
	3	1	0	1	1	0			0	0	0	0
	3	1	0	1	1	0			0	0	0	0
	3	1	0	1	1	0			0	0	0	0
	3	1	0	1	2	0			0	0	0	0
	3	1	0	1	1	0			0	0	0	0
	3	1	0	1	1	0			0	0	0	0
	3	1	0	1	1	0			0	0	0	0
	3	1	0	1	2	0			0	0	0	0
	3	1	0	1	2	0			0	0	0	0
	3	1	1	1	2	2	486.57	486.57	2	1	0	0
	3	1	0	1	2	0			0	0	0	0
	3	1	0	1	1	0			0	0	0	0
	3	1	0	1	2	0			0	0	0	0
	3	1	2	1	1	2	436.67	436.67	2	1	0	0
	3	1	0	1	2	0			0	0	0	0
	3	1	0	1	1	0			0	0	0	0
	3	1	0	1	1	0			0	0	0	0
	3	1	0	1	2	0			0	0	0	0
	3	1	0	1	1	0			0	0	0	0
	3	1	0	1	2	0			0	0	0	0
	3	1	0	1	2	0			0	0	0	0
	3	1	0	1	1	0			0	0	0	0
	3	1	2	1	1	2	453.17	453.17	2	1	0	0
	3	1	0	1	1	0			0	0	0	0
	3	1	0	1	1	0			0	0	0	0
	3	1	0	1	2	0			0	0	0	0
	3	1	0	1	1	0			0	0	0	0
	3	1	2	1	1	2	503.77	503.77	2	1	0	0
	3	1	2	1	1	2	419.97	419.97	2	1	0	0
	3	1	1	1	2	2	403.17	403.17	2	1	0	0
	3	1	0	1	2	0			0	0	0	0
	3	1	0	1	1	0			0	0	0	0
	3	1	2	1	1	2	469.97	469.97	2	1	0	0
	3	1	0	1	2	0	528.47	528.47	2	0	0	1
	3	1	0	1	1	0	378.27	378.27	2	0	0	1
	3	1	2	1	1	2	370.47	370.47	2	1	0	0
	3	1	1	1	2	2	369.87	369.87	2	1	0	0
	3	1	1	1	2	2	378.27	378.27	2	1	0	0
	3	1	0	1	2	0			0	0	0	0
	3	1	0	1	1	0			0	0	0	0
	3	1	0	1	2	0			0	0	0	0
	3	1	0	1	2	0			0	0	0	0
	3	1	0	1	2	0			0	0	0	0
	3	1	0	1	2	0			0	0	0	0
	3	1	2	1	1	2	478.17	478.17	2	1	0	0
	3	1	2	1	1	2	411.47	411.47	2	1	0	0
	3	1	0	1	1	0			0	0	0	0
	3	1	0	1	1	0			0	0	0	0
	3	1	0	1	1	0			0	0	0	0
	3	1	0	1	2	0			0	0	0	0
	3	1	2	1	1	2	461.37	461.37	2	1	0	0
	3	1	0	1	2	0			0	0	0	0
	3	1	0	1	2	0			0	0	0	0
	3	1	1	1	2	2	495.07	495.07	2	1	0	0
	3	1	1	1	2	2	337.27	337.27	2	1	0	0
	3	1	0	1	1	0			0	0	0	0
	3	1	0	1	1	0			0	0	0	0
	3	1	2	1	1	2	478.07	478.07	2	1	0	0
	3	1	0	1	1	0			0	0	0	0
	3	1	0	1	1	0			0	0	0	0
	3	1	0	1	2	0			0	0	0	0
	3	1	0	1	2	0			0	0	0	0
	3	1	0	1	1	0			0	0	0	0
	3	1	0	1	1	0			0	0	0	0
	3	1	0	1	2	0			0	0	0	0
	3	1	0	1	2	0			0	0	0	0
	3	1	0	1	2	0			0	0	0	0
	3	1	2	1	1	2	461.57	461.57	2	1	0	0
	3	1	0	1	2	0			0	0	0	0
	3	1	0	1	1	0			0	0	0	0
	3	1	2	1	1	2	436.77	436.77	2	1	0	0
	3	1	0	1	1	0			0	0	0	0
	3	1	0	1	1	0			0	0	0	0
	3	1	0	1	1	0			0	0	0	0
	3	1	0	1	1	0			0	0	0	0
	3	1	0	1	1	0			0	0	0	0
	3	1	1	1	2	2	403.27	403.27	2	1	0	0
	3	1	0	1	2	0			0	0	0	0
	3	1	0	1	1	0			0	0	0	0
	3	1	2	1	1	2	444.87	444.87	2	1	0	0
	3	1	1	1	2	2	469.97	469.97	2	1	0	0
	3	1	0	1	2	0			0	0	0	0
	3	1	0	1	1	0			0	0	0	0
	3	1	1	1	2	2	336.67	336.67	2	1	0	0
	3	1	0	1	1	0			0	0	0	0
	3	1	0	1	2	0		161.37	2	0	0	1
	3	1	0	1	1	0			0	0	0	0
	3	1	0	1	1	0			0	0	0	0
	3	1	0	1	2	0			0	0	0	0
	3	1	1	1	2	2	411.67	411.67	2	1	0	0
	3	1	2	1	1	2	395.27	395.27	2	1	0	0
	3	1	1	1	2	2	394.67	394.67	2	1	0	0
	3	1	2	1	1	2	461.77	461.77	2	1	0	0
	3	1	0	1	2	0			0	0	0	0
	3	1	0	1	1	0			0	0	0	0
	3	1	0	1	2	0			0	0	0	0
	3	1	0	1	2	0			0	0	0	0
	3	1	2	1	1	2	403.27	403.27	2	1	0	0
	3	1	0	1	2	0			0	0	0	0
	3	1	0	1	2	0			0	0	0	0
	3	1	0	1	1	0			0	0	0	0
	3	1	0	1	2	0			0	0	0	0
	3	1	0	1	2	0			0	0	0	0
	3	1	0	1	2	0			0	0	0	0
	3	1	0	1	1	0			0	0	0	0
	3	1	2	1	1	2	411.47	411.47	2	1	0	0
	3	1	0	1	1	0			0	0	0	0
	3	1	0	1	2	0			0	0	0	0
	3	1	0	1	1	0			0	0	0	0
	3	1	2	1	1	2	369.87	369.87	2	1	0	0
	3	1	0	1	2	0			0	0	0	0
	3	1	0	1	2	0			0	0	0	0
	3	1	0	1	1	0			0	0	0	0
	3	1	0	1	1	0			0	0	0	0
	3	1	0	1	1	0			0	0	0	0
	3	1	0	1	1	0			0	0	0	0
	3	1	0	1	2	0			0	0	0	0
	3	1	2	1	1	2	403.37	403.37	2	1	0	0
	3	1	0	1	1	0			0	0	0	0
	3	1	0	1	1	0			0	0	0	0
	3	1	1	1	2	2	436.47	436.47	2	1	0	0
	3	1	0	1	1	0			0	0	0	0
	3	1	0	1	1	0			0	0	0	0
	3	1	0	1	1	0			0	0	0	0
	3	1	0	1	1	0			0	0	0	0
	3	1	0	1	2	0			0	0	0	0
	3	1	0	1	2	0			0	0	0	0
	3	1	1	1	2	2	361.57	361.57	2	1	0	0
	3	1	0	1	1	0			0	0	0	0
	3	1	0	1	1	0	336.57	336.57	2	0	0	1
	3	1	0	1	2	0			0	0	0	0
	3	1	0	1	1	0			0	0	0	0
	3	1	0	1	2	0			0	0	0	0
	3	1	1	1	2	2	411.87	411.87	2	1	0	0
	3	1	0	1	2	0			0	0	0	0
	3	1	0	1	1	0			0	0	0	0
	3	1	2	1	1	2	478.27	478.27	2	1	0	0
	3	1	2	1	1	2	420.37	420.37	2	1	0	0
	3	1	0	1	1	0			0	0	0	0
	3	1	0	1	2	0			0	0	0	0
	3	1	0	1	2	0			0	0	0	0
	3	1	0	1	2	0			0	0	0	0
	3	1	0	1	2	0			0	0	0	0
	3	1	0	1	1	0			0	0	0	0
	3	1	2	1	1	2	511.57	511.57	2	1	0	0
	3	1	0	1	2	0			0	0	0	0
	3	1	0	1	2	0			0	0	0	0
	3	1	0	1	2	0			0	0	0	0
	3	1	1	1	2	2	453.77	453.77	2	1	0	0
	3	1	0	1	1	0			0	0	0	0
	3	1	0	1	1	0			0	0	0	0
	3	1	0	1	2	0			0	0	0	0
	3	1	0	1	1	0			0	0	0	0
	3	1	0	1	1	0			0	0	0	0
	3	1	0	1	1	0			0	0	0	0
	3	1	2	1	1	2	478.27	478.27	2	1	0	0
	3	1	0	1	2	0			0	0	0	0
	3	1	1	1	2	2	370.37	370.37	2	1	0	0
	3	1	2	1	1	2	461.47	461.47	2	1	0	0
	3	1	0	1	2	0			0	0	0	0
	3	1	0	1	1	0			0	0	0	0
	3	1	0	1	1	0			0	0	0	0
	3	1	0	1	2	0			0	0	0	0
	3	1	0	1	2	0			0	0	0	0
	3	1	0	1	2	0			0	0	0	0
	3	1	2	1	1	2	470.17	470.17	2	1	0	0
	3	1	0	1	1	0			0	0	0	0
	3	1	0	1	1	0			0	0	0	0
	3	1	0	1	1	0			0	0	0	0
	3	1	0	1	1	0			0	0	0	0
	3	1	0	1	2	0			0	0	0	0
	3	1	1	1	2	2	461.57	461.57	2	1	0	0
	3	1	0	1	1	0			0	0	0	0
	3	1	0	1	2	0			0	0	0	0
	3	1	2	1	1	2	453.27	453.27	2	1	0	0
	3	1	0	1	2	0			0	0	0	0
	3	1	1	1	2	2	461.47	461.47	2	1	0	0
	3	1	0	1	2	0			0	0	0	0
	3	1	0	1	1	0			0	0	0	0
	3	1	0	1	2	0			0	0	0	0
	3	1	1	1	2	2	428.27	428.27	2	1	0	0
	3	1	0	1	2	0			0	0	0	0
	3	1	0	1	1	0			0	0	0	0
	3	1	0	1	2	0			0	0	0	0
	3	1	0	1	1	0			0	0	0	0
	3	1	1	1	2	2	453.47	453.47	2	1	0	0
	3	1	0	1	2	0			0	0	0	0
	3	1	1	1	2	2	411.57	411.57	2	1	0	0
	3	1	2	1	1	2	444.97	444.97	2	1	0	0
	3	1	0	1	1	0			0	0	0	0
	3	1	0	1	2	0			0	0	0	0
	3	1	0	1	2	0			0	0	0	0
	3	1	1	1	2	2	411.57	411.57	2	1	0	0
	3	1	2	1	1	2	428.17	428.17	2	1	0	0
	3	1	0	1	1	0			0	0	0	0
	3	1	0	1	1	0			0	0	0	0
	3	1	0	1	1	0			0	0	0	0
	3	1	0	1	2	0			0	0	0	0
	3	1	0	1	1	0			0	0	0	0
	3	1	0	1	2	0			0	0	0	0
	3	1	0	1	2	0			0	0	0	0
	3	1	0	1	1	0			0	0	0	0
	3	1	0	1	1	0			0	0	0	0
	3	1	0	1	2	0			0	0	0	0
	3	1	1	1	2	2	469.97	469.97	2	1	0	0
	3	1	0	1	2	0			0	0	0	0
	3	2	1	1	2	2	453.47	453.47	2	1	0	0
	3	2	1	1	2	2	353.17	353.17	2	1	0	0
	3	2	1	1	2	2	286.87	286.87	2	1	0	0
	3	2	2	1	1	2	311.67	311.67	2	1	0	0
	3	2	2	1	1	2	303.57	303.57	2	1	0	0
	3	2	2	1	1	2	361.47	361.47	2	1	0	0
	3	2	2	1	1	2	295.07	295.07	2	1	0	0
	3	2	0	1	1	0	286.77	286.77	2	0	0	1
	3	2	0	1	1	0			0	0	0	0
	3	2	1	1	2	2	303.37	303.37	2	1	0	0
	3	2	1	1	2	2	278.17	278.17	2	1	0	0
	3	2	2	1	1	2	286.47	286.47	2	1	0	0
	3	2	1	1	2	2	278.07	278.07	2	1	0	0
	3	2	0	1	1	0	278.17	278.17	2	0	0	1
	3	2	1	1	2	2	345.27	345.27	2	1	0	0
	3	2	2	1	1	2	353.27	353.27	2	1	0	0
	3	2	1	1	2	2	369.97	369.97	2	1	0	0
	3	2	0	1	2	0	303.17	303.17	2	0	0	1
	3	2	0	1	1	0			0	0	0	0
	3	2	0	1	2	0			0	0	0	0
	3	2	2	1	1	2	394.97	394.97	2	1	0	0
	3	2	2	1	1	2	394.97	394.97	2	1	0	0
	3	2	2	1	1	2	370.07	370.07	2	1	0	0
	3	2	2	1	1	2	428.37	428.37	2	1	0	0
	3	2	2	1	1	2	394.87	394.87	2	1	0	0
	3	2	2	1	1	2	386.67	386.67	2	1	0	0
	3	2	2	1	1	2	319.97	319.97	2	1	0	0
	3	2	2	1	1	2	353.37	353.37	2	1	0	0
	3	2	1	1	2	2	403.27	403.27	2	1	0	0
	3	2	1	1	2	2	378.27	378.27	2	1	0	0
	3	2	1	1	2	2	353.07	353.07	2	1	0	0
	3	2	1	1	2	2	369.87	369.87	2	1	0	0
	3	2	0	1	1	0	336.67	336.67	2	0	0	1
	3	2	2	1	1	2	336.37	336.37	2	1	0	0
	3	2	0	1	2	0			0	0	0	0
	3	2	0	1	1	0			0	0	0	0
	3	2	0	1	1	0			0	0	0	0
	3	2	1	1	2	2	403.57	403.57	2	1	0	0
	3	2	2	1	1	2	353.57	353.57	2	1	0	0
	3	2	2	1	1	2	361.37	361.37	2	1	0	0
	3	2	0	1	2	0			0	0	0	0
	3	2	2	1	1	2	419.87	419.87	2	1	0	0
	3	2	0	1	2	0			0	0	0	0
	3	2	1	1	2	2	428.37	428.37	2	1	0	0
	3	2	0	1	1	0			0	0	0	0
	3	2	2	1	1	2	378.17	378.17	2	1	0	0
	3	2	0	1	2	0			0	0	0	0
	3	2	1	1	2	2	378.07	378.07	2	1	0	0
	3	2	2	1	1	2	403.47	403.47	2	1	0	0
	3	2	1	1	2	2	378.07	378.07	2	1	0	0
	3	2	1	1	2	2	336.67	336.67	2	1	0	0
	3	2	0	1	2	0			0	0	0	0
	3	2	1	1	2	2	411.67	411.67	2	1	0	0
	3	2	1	1	2	2	603.37	603.37	2	1	0	0
	3	2	2	1	1	2	337.07	337.07	2	1	0	0
	3	2	0	1	1	0	344.67	344.67	2	0	0	1
	3	2	2	1	1	2	353.27	353.27	2	1	0	0
	3	2	1	1	2	2	394.87	394.87	2	1	0	0
	3	2	1	1	2	2	386.57	386.57	2	1	0	0
	3	2	2	1	1	2	353.47	353.47	2	1	0	0
	3	2	2	1	1	2	345.17	345.17	2	1	0	0
	3	2	2	1	1	2	320.47	320.47	2	1	0	0
	3	2	1	1	2	2	270.87	270.87	2	1	0	0
	3	2	0	1	1	0			0	0	0	0
	3	2	1	1	2	2	378.27	378.27	2	1	0	0
	3	2	1	1	2	2	319.97	319.97	2	1	0	0
	3	2	0	1	2	0			0	0	0	0
	3	2	1	1	2	2	295.27	295.27	2	1	0	0
	3	2	2	1	1	2	378.07	378.07	2	1	0	0
	3	2	0	1	1	0			0	0	0	0
	3	2	2	1	1	2	428.37	428.37	2	1	0	0
	3	2	1	1	2	2	377.77	377.77	2	1	0	0
	3	2	2	1	1	2	419.77	419.77	2	1	0	0
	3	2	1	1	2	2	344.67	344.67	2	1	0	0
	3	2	1	1	2	2	327.97	327.97	2	1	0	0
	3	2	1	1	2	2	461.27	461.27	2	1	0	0
	3	2	2	1	1	2	419.67	419.67	2	1	0	0
	3	2	1	1	2	2	303.37	303.37	2	1	0	0
	3	2	2	1	1	2	294.87	294.87	2	1	0	0
	3	2	2	1	1	2	294.87	294.87	2	1	0	0
	3	2	2	1	1	2	277.97	277.97	2	1	0	0
	3	2	1	1	2	2	345.27	345.27	2	1	0	0
	3	2	0	1	1	0	294.67	294.67	2	0	0	1
	3	2	0	1	1	0			0	0	0	0
	3	2	1	1	2	2	353.37	353.37	2	1	0	0
	3	2	1	1	2	2	386.57	386.57	2	1	0	0
	3	2	2	1	1	2	378.27	378.27	2	1	0	0
	3	2	2	1	1	2	311.47	311.47	2	1	0	0
	3	2	0	1	1	0			0	0	0	0
	3	2	2	1	1	2	378.27	378.27	2	1	0	0
	3	2	2	1	1	2	444.97	444.97	2	1	0	0
	3	2	0	1	2	0			0	0	0	0
	3	2	1	1	2	2	319.87	319.87	2	1	0	0
	3	2	0	1	1	0			0	0	0	0
	3	2	0	1	2	0			0	0	0	0
	3	2	1	1	2	2	428.27	428.27	2	1	0	0
	3	2	1	1	2	2	370.07	370.07	2	1	0	0
	3	2	0	1	2	0			0	0	0	0
	3	2	2	1	1	2	344.67	344.67	2	1	0	0
	3	2	1	1	2	2	286.57	286.57	2	1	0	0
	3	2	2	1	1	2	303.67	303.67	2	1	0	0
	3	2	2	1	1	2	319.87	319.87	2	1	0	0
	3	2	0	1	2	0			0	0	0	0
	3	2	2	1	1	2	420.07	420.07	2	1	0	0
	3	2	2	1	1	2	428.07	428.07	2	1	0	0
	3	2	1	1	2	2	369.87	369.87	2	1	0	0
	3	2	2	1	1	2	403.17	403.17	2	1	0	0
	3	2	2	1	1	2	361.57	361.57	2	1	0	0
	3	2	2	1	1	2	336.47	336.47	2	1	0	0
	3	2	1	1	2	2	328.17	328.17	2	1	0	0
	3	2	2	1	1	2	287.37	287.37	2	1	0	0
	3	2	2	1	1	2	311.37	311.37	2	1	0	0
	3	2	0	1	1	0			0	0	0	0
	3	2	1	1	2	2	378.07	378.07	2	1	0	0
	3	2	1	1	2	2	369.77	369.77	2	1	0	0
	3	2	1	1	2	2	303.17	303.17	2	1	0	0
	3	2	0	1	2	0			0	0	0	0
	3	2	0	1	2	0			0	0	0	0
	3	2	1	1	2	2	353.27	353.27	2	1	0	0
	3	2	2	1	1	2	327.87	327.87	2	1	0	0
	3	2	1	1	2	2	328.17	328.17	2	1	0	0
	3	2	0	1	2	0			0	0	0	0
	3	2	1	1	2	2	386.67	386.67	2	1	0	0
	3	2	1	1	2	2	253.27	253.27	2	1	0	0
	3	2	2	1	1	2	244.97	244.97	2	1	0	0
	3	2	1	1	2	2	244.67	244.67	2	1	0	0
	3	2	1	1	2	2	311.27	311.27	2	1	0	0
	3	2	0	1	2	0	261.27	261.27	2	0	0	1
	4	1	2	1	1	2	578.27	578.27	2	1	0	0
	4	1	0	1	1	0			0	0	0	0
	4	1	0	1	1	0			0	0	0	0
	4	1	0	1	2	0			0	0	0	0
	4	1	2	1	1	2	520.17	520.17	2	1	0	0
	4	1	0	1	2	0			0	0	0	0
	4	1	0	1	2	0			0	0	0	0
	4	1	0	1	1	0			0	0	0	0
	4	1	0	1	2	0			0	0	0	0
	4	1	0	1	2	0			0	0	0	0
	4	1	0	1	1	0			0	0	0	0
	4	1	0	1	2	0			0	0	0	0
	4	1	0	1	2	0			0	0	0	0
	4	1	0	1	1	0			0	0	0	0
	4	1	0	1	1	0			0	0	0	0
	4	1	2	1	1	2	570.07	570.07	2	1	0	0
	4	1	0	1	1	0			0	0	0	0
	4	1	0	1	2	0			0	0	0	0
	4	1	0	1	2	0			0	0	0	0
	4	1	1	1	2	2	494.97	494.97	2	1	0	0
	4	1	0	1	2	0			0	0	0	0
	4	1	0	1	1	0			0	0	0	0
	4	1	0	1	1	0			0	0	0	0
	4	1	1	1	2	2	586.87	586.87	2	1	0	0
	4	1	0	1	2	0			0	0	0	0
	4	1	0	1	2	0			0	0	0	0
	4	1	0	1	1	0			0	0	0	0
	4	1	0	1	1	0			0	0	0	0
	4	1	0	1	1	0			0	0	0	0
	4	1	0	1	2	0			0	0	0	0
	4	1	0	1	1	0			0	0	0	0
	4	1	1	1	2	2	553.37	553.37	2	1	0	0
	4	1	0	1	2	0			0	0	0	0
	4	1	0	1	1	0			0	0	0	0
	4	1	0	1	1	0			0	0	0	0
	4	1	0	1	2	0			0	0	0	0
	4	1	0	1	1	0			0	0	0	0
	4	1	0	1	2	0			0	0	0	0
	4	1	0	1	1	0			0	0	0	0
	4	1	0	1	1	0			0	0	0	0
	4	1	0	1	2	0			0	0	0	0
	4	1	0	1	1	0			0	0	0	0
	4	1	0	1	1	0			0	0	0	0
	4	1	2	1	1	2	520.17	520.17	2	1	0	0
	4	1	2	1	1	2	503.37	503.37	2	1	0	0
	4	1	0	1	2	0			0	0	0	0
	4	1	1	1	2	2	486.57	486.57	2	1	0	0
	4	1	0	1	1	0			0	0	0	0
	4	1	0	1	2	0			0	0	0	0
	4	1	0	1	1	0			0	0	0	0
	4	1	0	1	1	0			0	0	0	0
	4	1	1	1	2	2	436.77	436.77	2	1	0	0
	4	1	1	1	2	2	444.87	444.87	2	1	0	0
	4	1	0	1	1	0			0	0	0	0
	4	1	1	1	2	2	428.17	428.17	2	1	0	0
	4	1	0	1	2	0			0	0	0	0
	4	1	0	1	2	0			0	0	0	0
	4	1	2	1	1	2	411.47	411.47	2	1	0	0
	4	1	0	1	1	0			0	0	0	0
	4	1	0	1	1	0			0	0	0	0
	4	1	1	1	2	2	428.17	428.17	2	1	0	0
	4	1	0	1	1	0			0	0	0	0
	4	1	0	1	2	0			0	0	0	0
	4	1	0	1	1	0			0	0	0	0
	4	1	0	1	2	0			0	0	0	0
	4	1	0	1	1	0			0	0	0	0
	4	1	0	1	2	0			0	0	0	0
	4	1	0	1	1	0			0	0	0	0
	4	1	0	1	1	0			0	0	0	0
	4	1	2	1	1	2	470.07	470.07	2	1	0	0
	4	1	0	1	2	0			0	0	0	0
	4	1	1	1	2	2	403.47	403.47	2	1	0	0
	4	1	0	1	1	0			0	0	0	0
	4	1	0	1	1	0			0	0	0	0
	4	1	0	1	2	0			0	0	0	0
	4	1	0	1	1	0			0	0	0	0
	4	1	0	1	1	0			0	0	0	0
	4	1	1	1	2	2	436.67	436.67	2	1	0	0
	4	1	0	1	2	0			0	0	0	0
	4	1	2	1	1	2	345.27	345.27	2	1	0	0
	4	1	0	1	2	0			0	0	0	0
	4	1	2	1	1	2	403.47	403.47	2	1	0	0
	4	1	0	1	2	0			0	0	0	0
	4	1	0	1	1	0			0	0	0	0
	4	1	2	1	1	2	470.07	470.07	2	1	0	0
	4	1	2	1	1	2	461.57	461.57	2	1	0	0
	4	1	0	1	2	0			0	0	0	0
	4	1	1	1	2	2	378.37	378.37	2	1	0	0
	4	1	0	1	2	0			0	0	0	0
	4	1	0	1	1	0			0	0	0	0
	4	1	0	1	1	0			0	0	0	0
	4	1	0	1	2	0			0	0	0	0
	4	1	0	1	2	0			0	0	0	0
	4	1	0	1	1	0			0	0	0	0
	4	1	0	1	1	0			0	0	0	0
	4	1	0	1	1	0			0	0	0	0
	4	1	0	1	2	0			0	0	0	0
	4	1	0	1	2	0			0	0	0	0
	4	1	1	1	2	2	470.07	470.07	2	1	0	0
	4	1	0	1	2	0			0	0	0	0
	4	1	1	1	2	2	436.37	436.37	2	1	0	0
	4	1	0	1	1	0			0	0	0	0
	4	1	0	1	1	0			0	0	0	0
	4	1	0	1	2	0			0	0	0	0
	4	1	2	1	1	2	420.07	420.07	2	1	0	0
	4	1	1	1	2	2	478.27	478.27	2	1	0	0
	4	1	0	1	2	0			0	0	0	0
	4	1	2	1	1	2	403.47	403.47	2	1	0	0
	4	1	0	1	2	0			0	0	0	0
	4	1	0	1	1	0			0	0	0	0
	4	1	2	1	1	2	461.67	461.67	2	1	0	0
	4	1	0	1	1	0			0	0	0	0
	4	1	0	1	1	0			0	0	0	0
	4	1	2	1	1	2	411.57	411.57	2	1	0	0
	4	1	0	1	2	0			0	0	0	0
	4	1	0	1	2	0			0	0	0	0
	4	1	1	1	2	2	420.07	420.07	2	1	0	0
	4	1	2	1	1	2	428.07	428.07	2	1	0	0
	4	1	1	1	2	2	419.97	419.97	2	1	0	0
	4	1	0	1	1	0			0	0	0	0
	4	1	0	1	2	0			0	0	0	0
	4	1	0	1	1	0			0	0	0	0
	4	1	0	1	2	0			0	0	0	0
	4	1	0	1	2	0			0	0	0	0
	4	1	0	1	2	0			0	0	0	0
	4	1	0	1	2	0			0	0	0	0
	4	1	0	1	2	0			0	0	0	0
	4	1	0	1	2	0			0	0	0	0
	4	1	0	1	2	0			0	0	0	0
	4	1	0	1	1	0			0	0	0	0
	4	1	1	1	2	2	470.07	470.07	2	1	0	0
	4	1	0	1	1	0			0	0	0	0
	4	1	0	1	2	0			0	0	0	0
	4	1	0	1	1	0			0	0	0	0
	4	1	0	1	2	0			0	0	0	0
	4	1	0	1	1	0			0	0	0	0
	4	1	0	1	1	0			0	0	0	0
	4	1	1	1	2	2	453.47	453.47	2	1	0	0
	4	1	0	1	1	0			0	0	0	0
	4	1	0	1	2	0			0	0	0	0
	4	1	0	1	1	0			0	0	0	0
	4	1	0	1	2	0			0	0	0	0
	4	1	1	1	2	2	453.57	453.57	2	1	0	0
	4	1	1	1	2	2	478.27	478.27	2	1	0	0
	4	1	0	1	2	0			0	0	0	0
	4	1	0	1	1	0			0	0	0	0
	4	1	0	1	2	0			0	0	0	0
	4	1	0	1	2	0			0	0	0	0
	4	1	1	1	2	2	444.97	444.97	2	1	0	0
	4	1	0	1	1	0			0	0	0	0
	4	1	0	1	1	0			0	0	0	0
	4	1	0	1	1	0			0	0	0	0
	4	1	2	1	1	2	453.37	453.37	2	1	0	0
	4	1	0	1	2	0			0	0	0	0
	4	1	2	1	1	2	420.57	420.57	2	1	0	0
	4	1	0	1	2	0			0	0	0	0
	4	1	0	1	2	0			0	0	0	0
	4	1	0	1	1	0			0	0	0	0
	4	1	0	1	2	0			0	0	0	0
	4	1	1	1	2	2	511.67	511.67	2	1	0	0
	4	1	1	1	2	2	461.57	461.57	2	1	0	0
	4	1	2	1	1	2	444.97	444.97	2	1	0	0
	4	1	2	1	1	2	395.47	395.47	2	1	0	0
	4	1	0	1	2	0			0	0	0	0
	4	1	0	1	2	0			0	0	0	0
	4	1	0	1	1	0			0	0	0	0
	4	1	2	1	1	2	470.07	470.07	2	1	0	0
	4	1	0	1	1	0			0	0	0	0
	4	1	1	1	2	2	436.77	436.77	2	1	0	0
	4	1	0	1	1	0			0	0	0	0
	4	1	0	1	1	0			0	0	0	0
	4	1	0	1	1	0			0	0	0	0
	4	1	0	1	1	0			0	0	0	0
	4	1	0	1	1	0			0	0	0	0
	4	1	0	1	1	0			0	0	0	0
	4	1	0	1	1	0			0	0	0	0
	4	1	0	1	1	0			0	0	0	0
	4	1	0	1	1	0			0	0	0	0
	4	1	0	1	2	0			0	0	0	0
	4	1	0	1	1	0			0	0	0	0
	4	1	0	1	1	0			0	0	0	0
	4	1	0	1	2	0			0	0	0	0
	4	1	0	1	1	0			0	0	0	0
	4	1	0	1	1	0			0	0	0	0
	4	1	1	1	2	2	486.77	486.77	2	1	0	0
	4	1	0	1	2	0			0	0	0	0
	4	1	0	1	2	0			0	0	0	0
	4	1	0	1	1	0			0	0	0	0
	4	1	0	1	2	0			0	0	0	0
	4	1	0	1	2	0			0	0	0	0
	4	1	2	1	1	2	453.37	453.37	2	1	0	0
	4	1	2	1	1	2	453.37	453.37	2	1	0	0
	4	1	0	1	1	0			0	0	0	0
	4	1	0	1	2	0			0	0	0	0
	4	1	0	1	2	0			0	0	0	0
	4	1	0	1	2	0			0	0	0	0
	4	1	0	1	1	0			0	0	0	0
	4	1	0	1	1	0			0	0	0	0
	4	1	0	1	2	0			0	0	0	0
	4	1	1	1	2	2	453.57	453.57	2	1	0	0
	4	1	2	1	1	2	436.77	436.77	2	1	0	0
	4	1	0	1	1	0			0	0	0	0
	4	1	0	1	2	0			0	0	0	0
	4	1	1	1	2	2	453.37	453.37	2	1	0	0
	4	1	2	1	1	2	420.07	420.07	2	1	0	0
	4	1	0	1	2	0			0	0	0	0
	4	1	0	1	1	0			0	0	0	0
	4	1	0	1	2	0			0	0	0	0
	4	1	2	1	1	2	520.17	520.17	2	1	0	0
	4	1	0	1	2	0			0	0	0	0
	4	1	0	1	1	0			0	0	0	0
	4	1	0	1	1	0			0	0	0	0
	4	1	0	1	2	0			0	0	0	0
	4	1	0	1	2	0			0	0	0	0
	4	1	0	1	1	0			0	0	0	0
	4	1	2	1	1	2	370.27	370.27	2	1	0	0
	4	1	0	1	2	0			0	0	0	0
	4	1	1	1	2	2	428.17	428.17	2	1	0	0
	4	1	0	1	2	0			0	0	0	0
	4	1	0	1	2	0			0	0	0	0
	4	1	0	1	2	0			0	0	0	0
	4	1	0	1	2	0			0	0	0	0
	4	1	0	1	1	0			0	0	0	0
	4	1	0	1	2	0			0	0	0	0
	4	1	0	1	2	0			0	0	0	0
	4	1	0	1	2	0			0	0	0	0
	4	1	0	1	1	0			0	0	0	0
	4	1	0	1	1	0			0	0	0	0
	4	1	2	1	1	2	453.47	453.47	2	1	0	0
	4	1	0	1	1	0			0	0	0	0
	4	1	0	1	2	0			0	0	0	0
	4	1	0	1	2	0			0	0	0	0
	4	1	0	1	1	0			0	0	0	0
	4	1	2	1	1	2	420.07	420.07	2	1	0	0
	4	1	0	1	2	0			0	0	0	0
	4	1	2	1	1	2	428.27	428.27	2	1	0	0
	4	1	0	1	1	0			0	0	0	0
	4	1	0	1	2	0			0	0	0	0
	4	1	1	1	2	2	378.27	378.27	2	1	0	0
	4	1	1	1	2	2	444.87	444.87	2	1	0	0
	4	1	2	1	1	2	344.87	344.87	2	1	0	0
	4	1	0	1	2	0			0	0	0	0
	4	1	1	1	2	2	353.57	353.57	2	1	0	0
	4	1	0	1	1	0			0	0	0	0
	4	1	0	1	1	0			0	0	0	0
	4	1	0	1	1	0			0	0	0	0
	4	1	1	1	2	2	436.87	436.87	2	1	0	0
	4	1	0	1	2	0			0	0	0	0
	4	1	0	1	2	0			0	0	0	0
	4	1	0	1	2	0			0	0	0	0
	4	1	0	1	2	0			0	0	0	0
	4	1	0	1	1	0			0	0	0	0
	4	1	2	1	1	2	386.77	386.77	2	1	0	0
	4	1	0	1	1	0			0	0	0	0
	4	1	0	1	1	0			0	0	0	0
	4	1	0	1	2	0			0	0	0	0
	4	1	0	1	1	0			0	0	0	0
	4	1	0	1	2	0			0	0	0	0
	4	1	0	1	1	0			0	0	0	0
	4	1	0	1	2	0			0	0	0	0
	4	1	0	1	1	0			0	0	0	0
	4	1	2	1	1	2	420.17	420.17	2	1	0	0
	4	1	0	1	1	0			0	0	0	0
	4	1	0	1	1	0			0	0	0	0
	4	1	0	1	1	0			0	0	0	0
	4	1	0	1	1	0			0	0	0	0
	4	1	0	1	1	0			0	0	0	0
	4	1	2	1	1	2	470.17	470.17	2	1	0	0
	4	1	0	1	1	0			0	0	0	0
	4	1	0	1	1	0			0	0	0	0
	4	1	0	1	2	0			0	0	0	0
	4	1	0	1	1	0			0	0	0	0
	4	1	1	1	2	2	462.37	462.37	2	1	0	0
	4	1	0	1	1	0			0	0	0	0
	4	1	0	1	2	0			0	0	0	0
	4	1	0	1	2	0			0	0	0	0
	4	1	0	1	1	0			0	0	0	0
	4	1	1	1	2	2	444.97	444.97	2	1	0	0
	4	1	0	1	1	0			0	0	0	0
	4	1	0	1	1	0			0	0	0	0
	4	1	0	1	2	0			0	0	0	0
	4	1	0	1	1	0			0	0	0	0
	4	1	0	1	1	0			0	0	0	0
	4	1	0	1	2	0			0	0	0	0
	4	1	2	1	1	2	445.07	445.07	2	1	0	0
	4	1	1	1	2	2	411.67	411.67	2	1	0	0
	4	1	0	1	2	0			0	0	0	0
	4	1	0	1	1	0			0	0	0	0
	4	1	0	1	2	0			0	0	0	0
	4	1	0	1	2	0			0	0	0	0
	4	1	0	1	1	0			0	0	0	0
	4	1	0	1	2	0			0	0	0	0
	4	1	0	1	2	0			0	0	0	0
	4	1	0	1	1	0			0	0	0	0
	4	1	0	1	2	0			0	0	0	0
	4	1	0	1	1	0			0	0	0	0
	4	1	0	1	1	0			0	0	0	0
	4	1	1	1	2	2	436.77	436.77	2	1	0	0
	4	1	0	1	1	0			0	0	0	0
	4	1	2	1	1	2	428.47	428.47	2	1	0	0
	4	1	1	1	2	2	444.87	444.87	2	1	0	0
	4	1	0	1	1	0			0	0	0	0
	4	1	0	1	1	0			0	0	0	0
	4	1	0	1	1	0			0	0	0	0
	4	1	1	1	2	2	378.17	378.17	2	1	0	0
	4	1	0	1	2	0			0	0	0	0
	4	1	1	1	2	2	378.17	378.17	2	1	0	0
	4	1	0	1	2	0			0	0	0	0
	4	1	0	1	1	0			0	0	0	0
	4	1	2	1	1	2	419.97	419.97	2	1	0	0
	4	1	0	1	2	0			0	0	0	0
	4	1	1	1	2	2	420.47	420.47	2	1	0	0
	4	1	0	1	2	0			0	0	0	0
	4	1	0	1	1	0			0	0	0	0
	4	1	0	1	2	0			0	0	0	0
	4	1	0	1	2	0			0	0	0	0
	4	1	2	1	1	2	378.27	378.27	2	1	0	0
	4	1	0	1	2	0			0	0	0	0
	4	1	0	1	1	0			0	0	0	0
	4	1	0	1	1	0			0	0	0	0
	4	1	0	1	1	0			0	0	0	0
	4	1	0	1	1	0			0	0	0	0
	4	1	0	1	2	0			0	0	0	0
	4	1	0	1	2	0			0	0	0	0
	4	1	0	1	1	0			0	0	0	0
	4	1	0	1	2	0			0	0	0	0
	4	1	1	1	2	2	470.17	470.17	2	1	0	0
	4	1	1	1	2	2	436.97	436.97	2	1	0	0
	4	1	2	1	1	2	428.17	428.17	2	1	0	0
	4	1	0	1	2	0			0	0	0	0
	4	1	1	1	2	2	453.47	453.47	2	1	0	0
	4	1	0	1	1	0			0	0	0	0
	4	1	0	1	2	0			0	0	0	0
	4	1	2	1	1	2	428.07	428.07	2	1	0	0
	4	1	2	1	1	2	536.87	536.87	2	1	0	0
	4	1	0	1	2	0			0	0	0	0
	4	1	0	1	2	0			0	0	0	0
	4	1	0	1	1	0			0	0	0	0
	4	1	0	1	1	0			0	0	0	0
	4	1	0	1	1	0			0	0	0	0
	4	1	0	1	1	0			0	0	0	0
	4	1	0	1	2	0			0	0	0	0
	4	1	0	1	2	0			0	0	0	0
	4	1	0	1	2	0			0	0	0	0
	4	1	0	1	2	0			0	0	0	0
	4	1	0	1	1	0			0	0	0	0
	4	1	0	1	2	0			0	0	0	0
	4	1	0	1	2	0			0	0	0	0
	4	1	2	1	1	2	470.07	470.07	2	1	0	0
	4	1	0	1	1	0			0	0	0	0
	4	1	2	1	1	2	403.57	403.57	2	1	0	0
	4	1	0	1	1	0			0	0	0	0
	4	1	0	1	2	0			0	0	0	0
	4	1	0	1	2	0			0	0	0	0
	4	1	0	1	2	0			0	0	0	0
	4	1	1	1	2	2	436.67	436.67	2	1	0	0
	4	1	2	1	1	2	394.87	394.87	2	1	0	0
	4	1	0	1	1	0			0	0	0	0
	4	1	0	1	2	0			0	0	0	0
	4	1	0	1	2	0			0	0	0	0
	4	1	1	1	2	2	437.07	437.07	2	1	0	0
	4	1	0	1	2	0			0	0	0	0
	4	1	0	1	2	0			0	0	0	0
	4	1	0	1	1	0			0	0	0	0
	4	1	0	1	1	0			0	0	0	0
	4	1	1	1	2	2	478.27	478.27	2	1	0	0
	4	1	0	1	2	0			0	0	0	0
	4	1	0	1	2	0			0	0	0	0
	4	1	2	1	1	2	378.37	378.37	2	1	0	0
	4	1	1	1	2	2	378.17	378.17	2	1	0	0
	4	1	0	1	2	0			0	0	0	0
	4	1	0	1	2	0			0	0	0	0
	4	1	2	1	1	2	353.47	353.47	2	1	0	0
	4	1	2	1	1	2	436.77	436.77	2	1	0	0
	4	1	0	1	2	0			0	0	0	0
	4	1	0	1	1	0			0	0	0	0
	4	1	0	1	2	0			0	0	0	0
	4	1	1	1	2	2	394.87	394.87	2	1	0	0
	4	1	0	1	2	0			0	0	0	0
	4	1	0	1	1	0			0	0	0	0
	4	1	0	1	1	0			0	0	0	0
	4	1	0	1	2	0			0	0	0	0
	4	1	2	1	1	2	461.67	461.67	2	1	0	0
	4	1	0	1	1	0			0	0	0	0
	4	2	1	1	2	2	636.87	636.87	2	1	0	0
	4	2	2	1	1	2	511.67	511.67	2	1	0	0
	4	2	1	1	2	2	603.27	603.27	2	1	0	0
	4	2	1	1	2	2	470.17	470.17	2	1	0	0
	4	2	1	1	2	2	494.97	494.97	2	1	0	0
	4	2	0	1	2	0			0	0	0	0
	4	2	1	1	2	2	478.17	478.17	2	1	0	0
	4	2	1	1	2	2	536.87	536.87	2	1	0	0
	4	2	0	1	1	0			0	0	0	0
	4	2	1	1	2	2	361.57	361.57	2	1	0	0
	4	2	0	1	2	0			0	0	0	0
	4	2	2	1	1	2	420.17	420.17	2	1	0	0
	4	2	0	1	2	0			0	0	0	0
	4	2	2	1	1	2	444.97	444.97	2	1	0	0
	4	2	1	1	2	2	619.97	619.97	2	1	0	0
	4	2	2	1	1	2	469.87	469.87	2	1	0	0
	4	2	1	1	2	2	536.67	536.67	2	1	0	0
	4	2	0	1	2	0			0	0	0	0
	4	2	1	1	2	2	511.67	511.67	2	1	0	0
	4	2	1	1	2	2	494.77	494.77	2	1	0	0
	4	2	2	1	1	2	478.37	478.37	2	1	0	0
	4	2	2	1	1	2	486.57	486.57	2	1	0	0
	4	2	2	1	1	2	469.87	469.87	2	1	0	0
	4	2	2	1	1	2	494.87	494.87	2	1	0	0
	4	2	1	1	2	2	453.17	453.17	2	1	0	0
	4	2	2	1	1	2	478.07	478.07	2	1	0	0
	4	2	2	1	1	2	428.07	428.07	2	1	0	0
	4	2	0	1	1	0			0	0	0	0
	4	2	1	1	2	2	411.77	411.77	2	1	0	0
	4	2	2	1	1	2	453.37	453.37	2	1	0	0
	4	2	2	1	1	2	503.37	503.37	2	1	0	0
	4	2	0	1	1	0			0	0	0	0
	4	2	2	1	1	2	369.77	369.77	2	1	0	0
	4	2	1	1	2	2	578.17	578.17	2	1	0	0
	4	2	0	1	1	0			0	0	0	0
	4	2	2	1	1	2	378.37	378.37	2	1	0	0
	4	2	0	1	2	0			0	0	0	0
	4	2	0	1	1	0			0	0	0	0
	4	2	2	1	1	2	369.97	369.97	2	1	0	0
	4	2	2	1	1	2	519.97	519.97	2	1	0	0
	4	2	0	1	2	0			0	0	0	0
	4	2	2	1	1	2	437.27	437.27	2	1	0	0
	4	2	0	1	1	0			0	0	0	0
	4	2	2	1	1	2	378.37	378.37	2	1	0	0
	4	2	1	1	2	2	503.47	503.47	2	1	0	0
	4	2	1	1	2	2	470.07	470.07	2	1	0	0
	4	2	1	1	2	2	503.47	503.47	2	1	0	0
	4	2	2	1	1	2	420.17	420.17	2	1	0	0
	4	2	1	1	2	2	461.57	461.57	2	1	0	0
	4	2	0	1	1	0			0	0	0	0
	4	2	2	1	1	2	394.97	394.97	2	1	0	0
	4	2	0	1	1	0			0	0	0	0
	4	2	1	1	2	2	428.47	428.47	2	1	0	0
	4	2	2	1	1	2	486.57	486.57	2	1	0	0
	4	2	1	1	2	2	436.77	436.77	2	1	0	0
	4	2	2	1	1	2	453.37	453.37	2	1	0	0
	4	2	2	1	1	2	444.97	444.97	2	1	0	0
	4	2	2	1	1	2	436.67	436.67	2	1	0	0
	4	2	1	1	2	2	444.97	444.97	2	1	0	0
	4	2	1	1	2	2	378.27	378.27	2	1	0	0
	4	2	2	1	1	2	536.87	536.87	2	1	0	0
	4	2	1	1	2	2	436.67	436.67	2	1	0	0
	4	2	1	1	2	2	369.77	369.77	2	1	0	0
	4	2	0	1	2	0			0	0	0	0
	4	2	2	1	1	2	420.17	420.17	2	1	0	0
	4	2	2	1	1	2	511.67	511.67	2	1	0	0
	4	2	0	1	2	0			0	0	0	0
	4	2	1	1	2	2	428.27	428.27	2	1	0	0
	4	2	0	1	2	0			0	0	0	0
	4	2	1	1	2	2	478.27	478.27	2	1	0	0
	4	2	1	1	2	2	512.07	512.07	2	1	0	0
	4	2	1	1	2	2	470.17	470.17	2	1	0	0
	4	2	1	1	2	2	436.67	436.67	2	1	0	0
	4	2	0	1	2	0			0	0	0	0
	4	2	0	1	1	0			0	0	0	0
	4	2	0	1	1	0			0	0	0	0
	4	2	2	1	1	2	411.57	411.57	2	1	0	0
	4	2	0	1	1	0			0	0	0	0
	4	2	1	1	2	2	394.97	394.97	2	1	0	0
[truncated: 29,233 more rows]
